# Supplementary material
Source: PubMed Central journal article supplement (PMC11028795)
Supplement: 262_2017_2047_MOESM1_ESM.pdf [file 262_2017_2047_MOESM1_ESM.pdf]

Shuptrine et al. Supplemental Figure 1

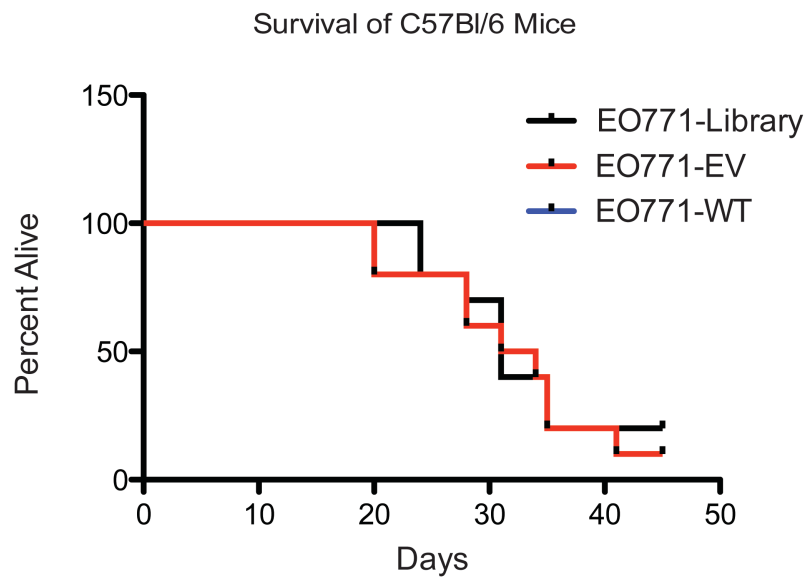

Supplemental Figure 1: Virus infection of EO771 cells does not influence survival of engrafted mice. Survival of C57Bl/6 mice bearing EO771 tumor cells infected with empty vector (red line), library (black line), and WT cells (blue line). N= 10 mice per group. Survival differences were considered significant when the Mantel-Cox test resulted in a  $p < 0.05$ .

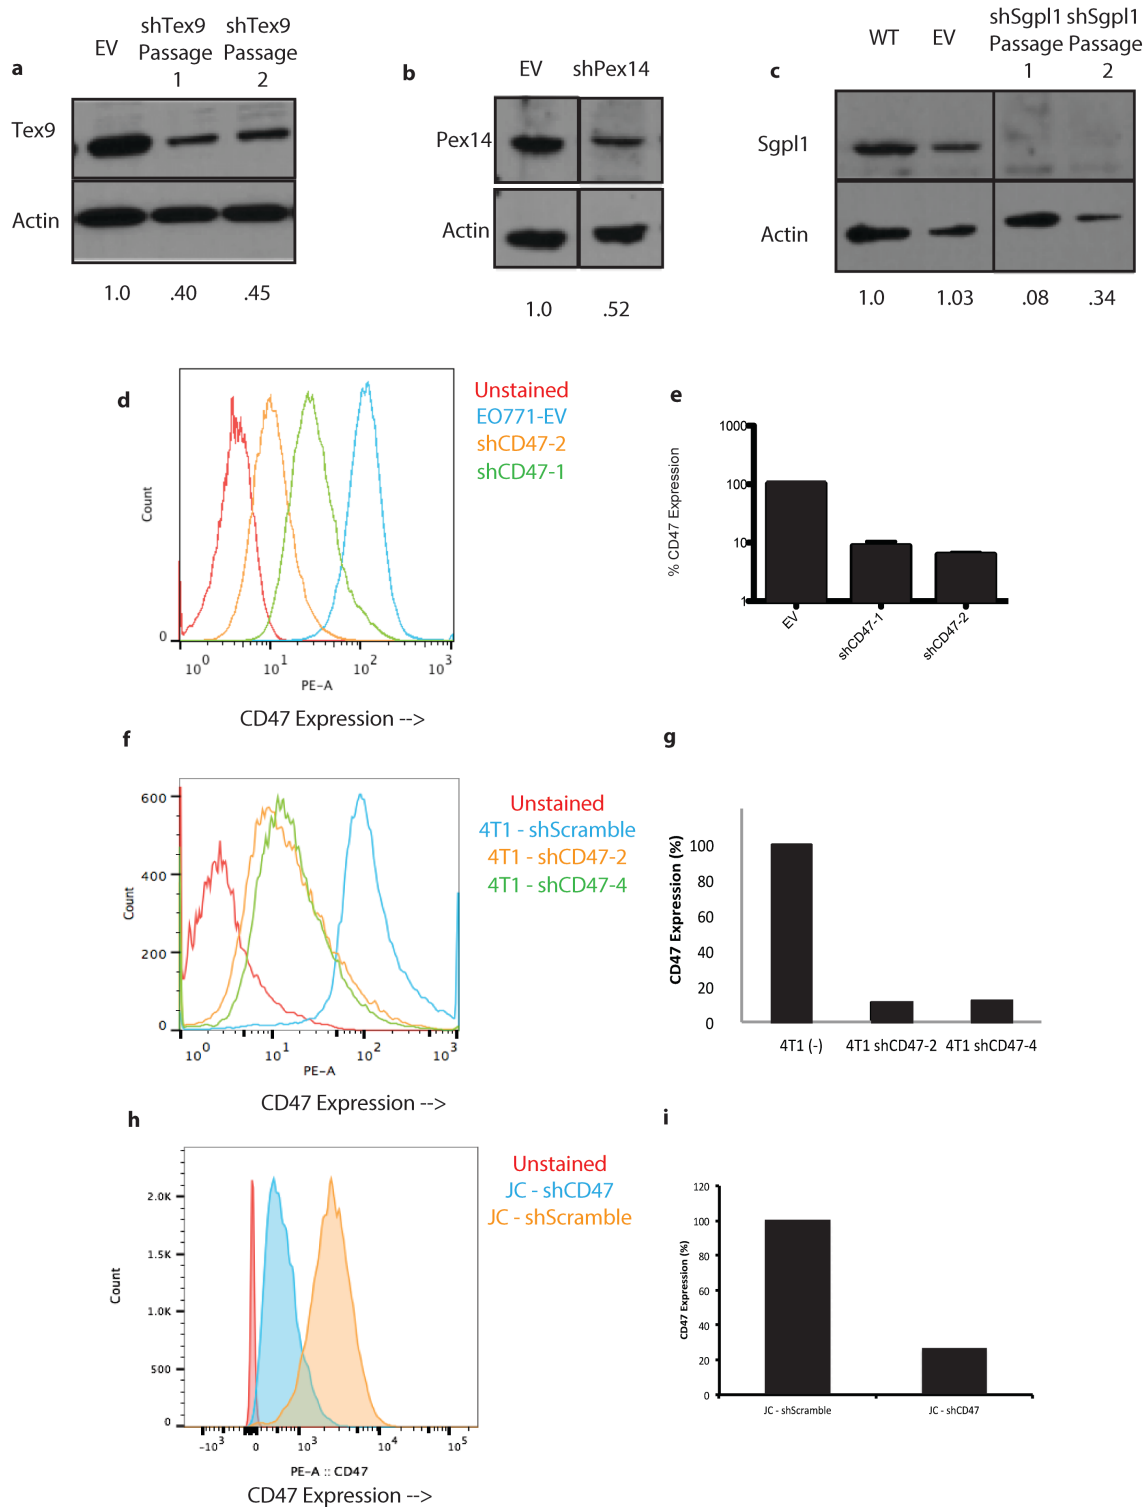

Supplemental Figure 2: Validation of protein KD for Tex9 (a), Pex14 (b), Sgpl1 (c), and CD47 (d-i), in EO771 (a-d), 4T1 (f-g), and JC (h-i) cells. Western blot analysis (a,b,c) of protein expression in EO771 cells. Quantification of protein expression was performed using ImageJ. Histogram analysis of CD47 expression was performed using FlowJo Version X. Panels e, g, and i are quantitative analyses of CD47 expression (geometric mean of RFI) compared to control cells.

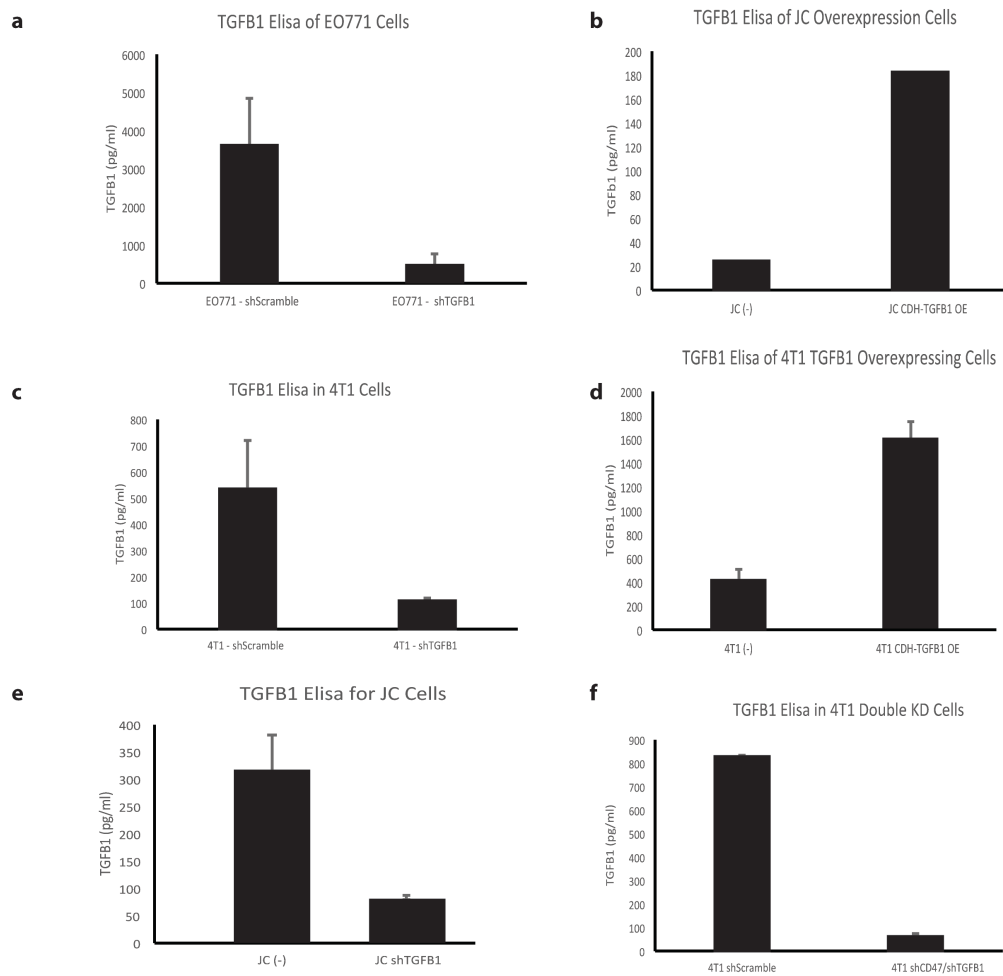

Supplemental Figure 3: Validation of protein KD and Overexpression of TGFβ1 in EO771 (**a**), 4T1 (**c,d,f**), and JC (**b,e**) cells. Elisa analysis of TGFβ1 expression was performed on supernatant exposed to the indicated cells for 48 hrs (**b, d**) or 72 hrs (**a, c, e, f**).

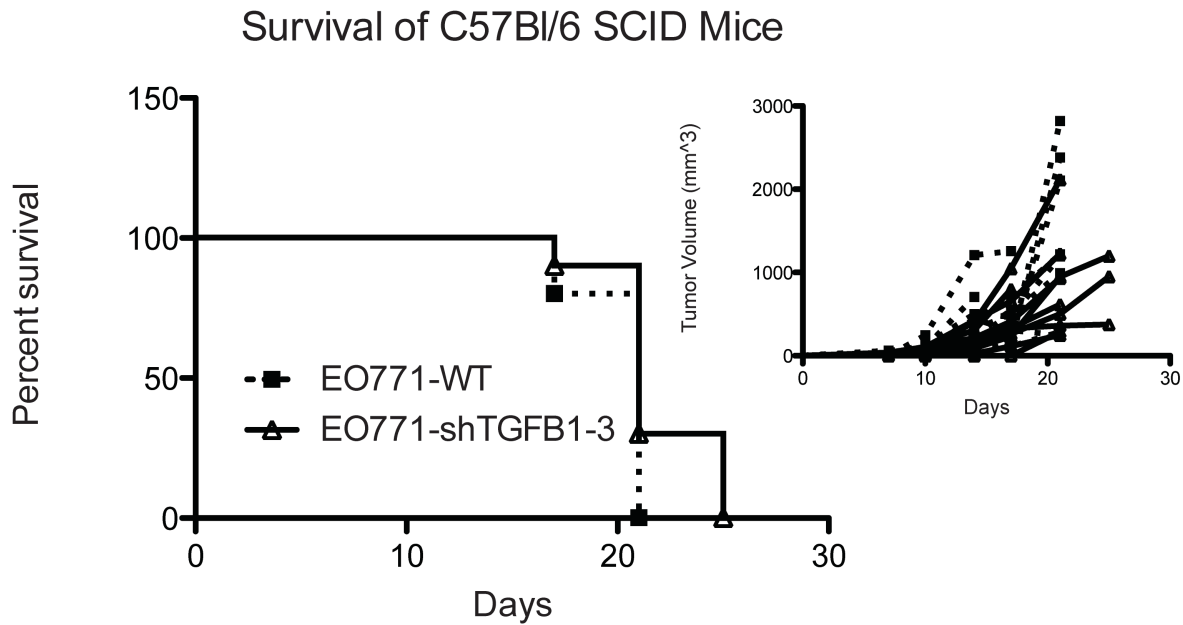

Supplemental Figure 4: TGF $\beta$ 1 Knockdown is not Sufficient to Influence Growth or Survival in an Immune Incompetent Murine Setting. In vivo analysis of C57Bl/6-SCID mice engrafted with  $2 \times 10^6$  EO771-shTGF $\beta$ 1 cells. N = 10 mice per group. The panel is a representative survival and growth kinetics analysis (panel insert) from one animal study and was repeated twice with equivalent results. The dotted lines and circle markers indicate mice engrafted with WT cells, solid lines and square markers represent those mice engrafted with cells with TGF $\beta$ 1 shRNA knockdown. Survival was considered significant when the Mantel-Cox test resulted in a  $p < 0.05$ .

Shuptrine et al. Supplemental Figure 5

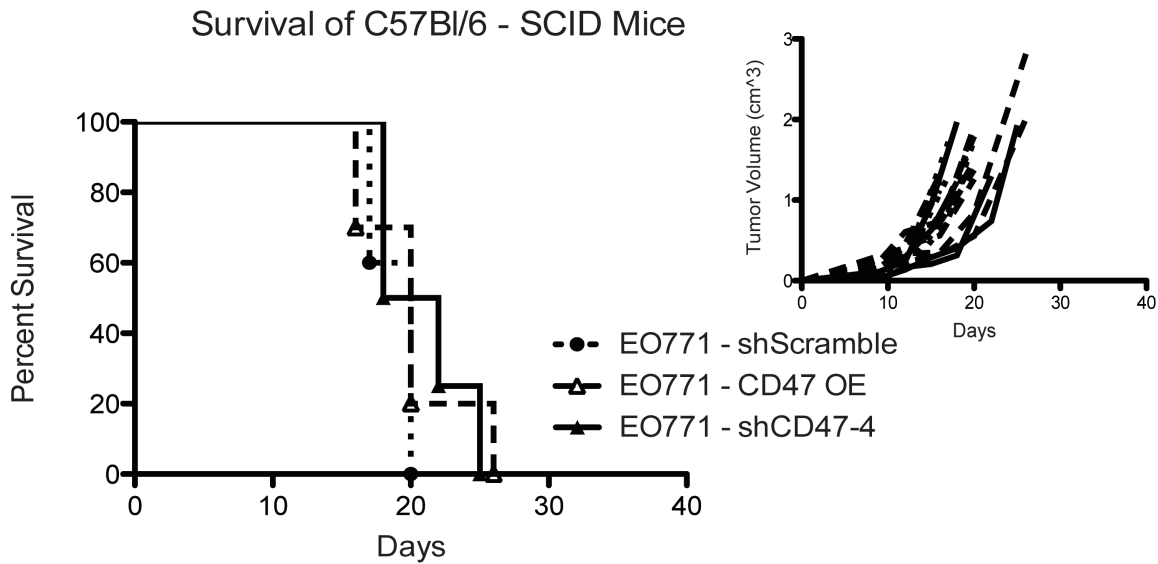

Supplemental Figure 5: CD47 Manipulation is not Sufficient to Influence Growth or Survival in an Immune Incompetent Murine Setting. In vivo analysis of C57Bl/6-SCID mice engrafted with  $2 \times 10^6$  EO771-shCD47 or EO771-CD47 overexpressing cells. N = 5 mice per group. The panel is a representative survival and growth kinetics analysis (panel insert) from one animal study and was repeated twice with equivalent results. The dotted lines and circle markers indicate mice engrafted with WT cells, solid lines and square markers represent those mice engrafted with cells with CD47 shRNA knockdown, dashed lines and triangle markers indicate mice engrafted with cells with CD47 overexpression. Survival was considered significant when the Mantel-Cox test resulted in a  $p < 0.05$ .

Shuptrine et al. Supplemental Figure 6

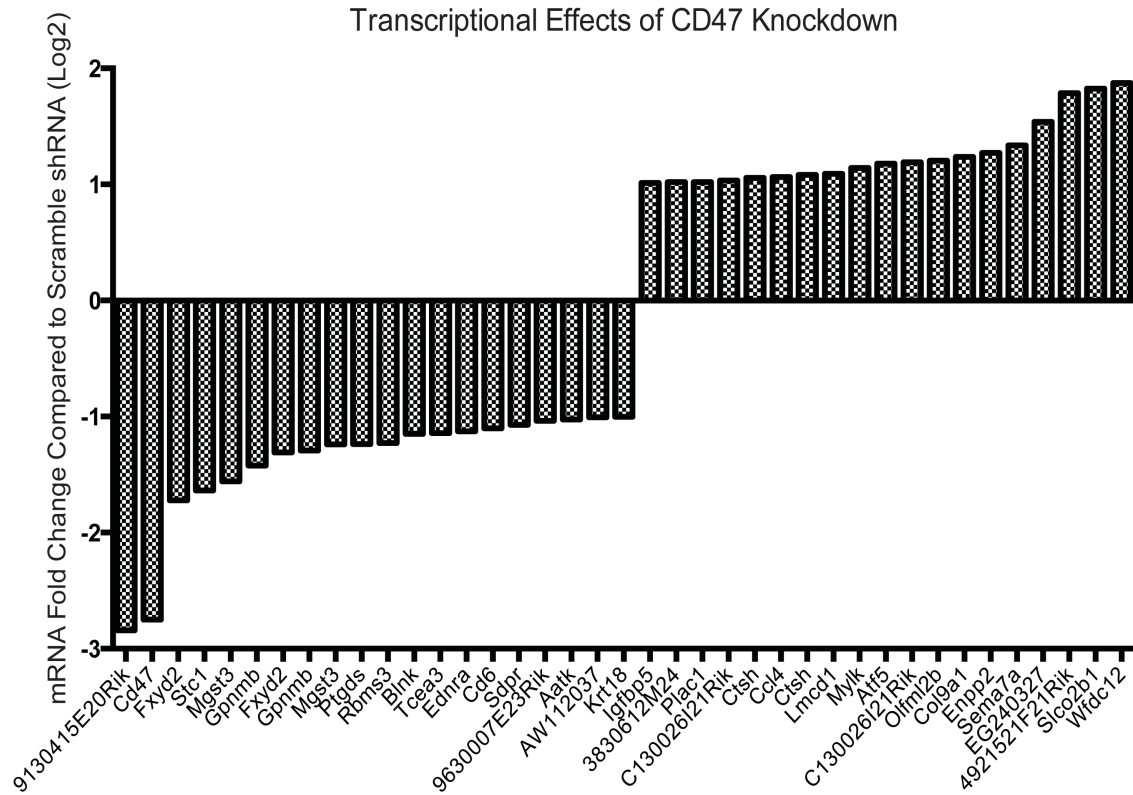

Supplemental Figure 6: Global Transcriptional Analysis of CD47 shRNA mediated knockdown in EO771 cells. Illumina expression analysis of cultured EO771 shCD47 cells compared to shScramble cells. Differentially regulated candidates were considered significant if differential analysis indicated an adjusted p value (q value) < 0.05. N=3 illumina arrays per group. Illumina MouseWG-6 v2.0 Expression BeadChips were utilized.

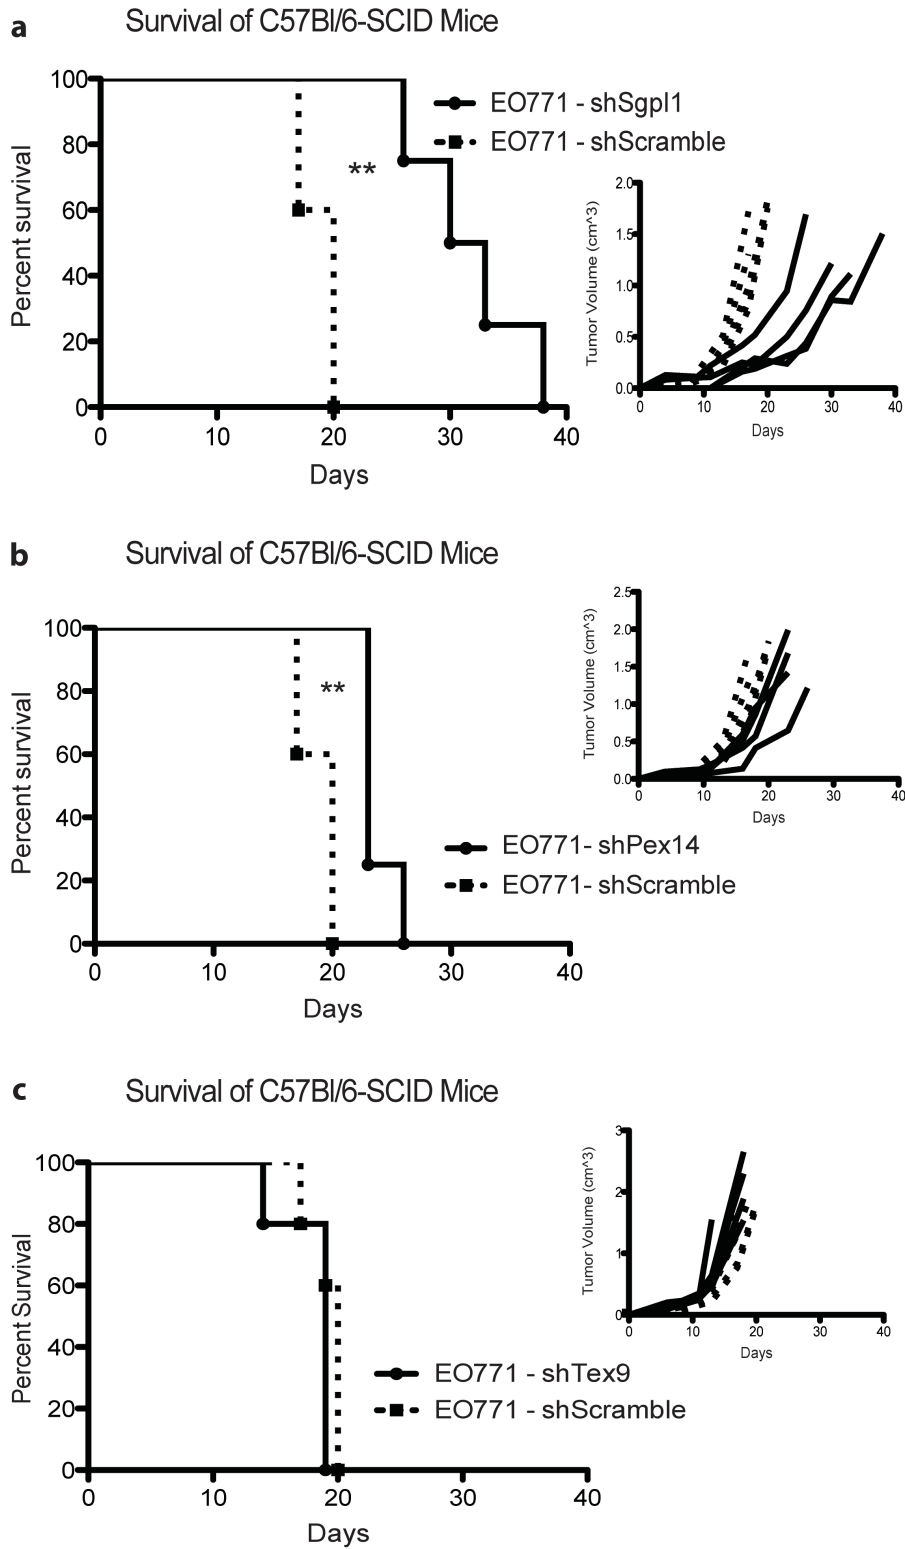

Supplemental Figure 7: Knockdown of the novel gene targets Sgpl1, Pex14, and Tex9 have modest effects on the in vivo growth and survival kinetics of EO771 tumors in immune incompetent mice. In vivo analysis of C57Bl/6-SCID mice engrafted with  $2 \times 10^6$  EO771-shScramble and shSgpl1 (a), shPex14 (b), or Tex9 (c) cells. N=5 mice per group. The panel is a representative survival and growth kinetics analysis (panel insert) from one animal study and was repeated once with equivalent results. The dotted lines and circle markers indicate mice engrafted with shScramble cells, solid lines and square markers represent those mice engrafted with cells with target gene shRNA knockdown.

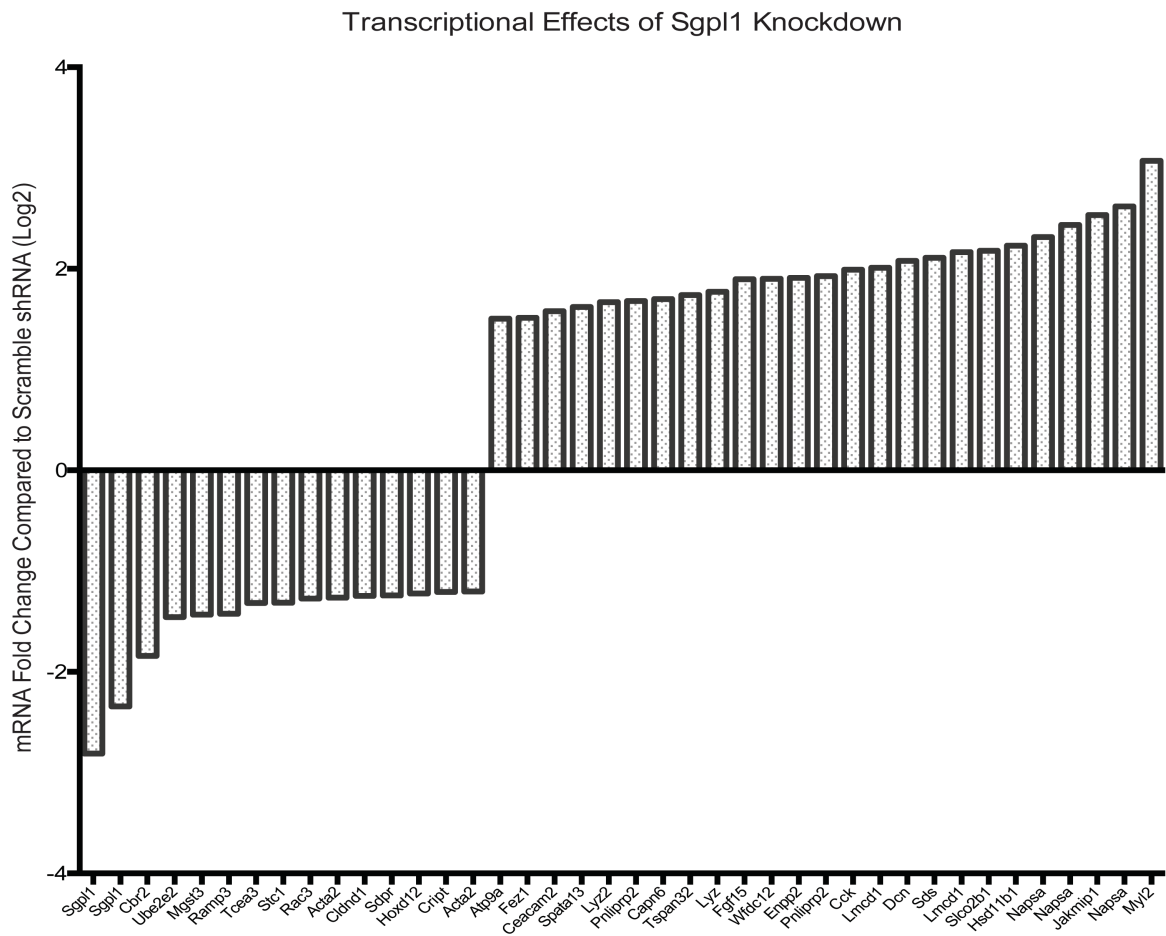

Supplemental Figure 8: Global Transcriptional Analysis of Sgpl1 shRNA mediated knockdown in EO771 cells. Illumina expression analysis of cultured EO771 shSgpl1 cells compared to shScramble cells. Differentially regulated candidates were considered significant if differential analysis indicated an adjusted p value (q value) < 0.05. N=3 illumina arrays per group. Illumina MouseWG-6 v2.0 Expression BeadChips were utilized.



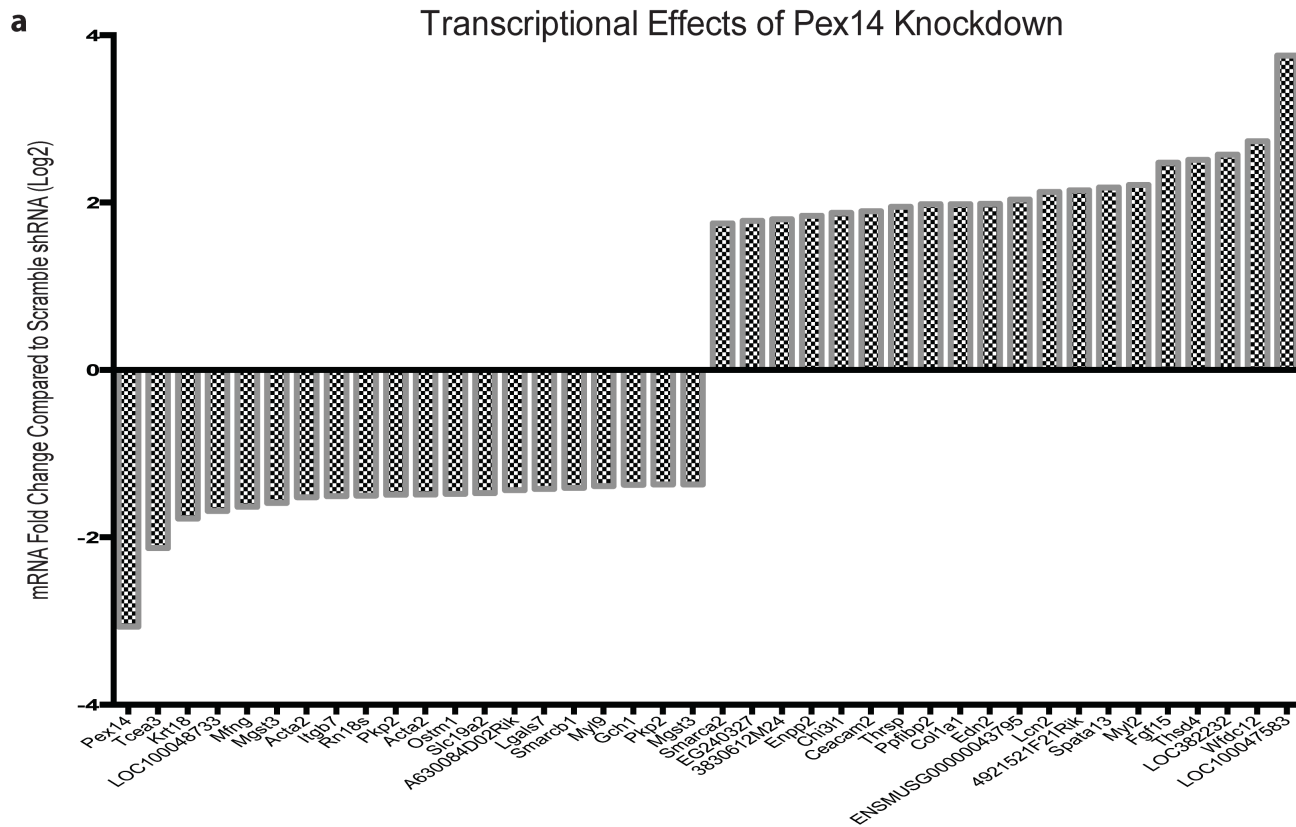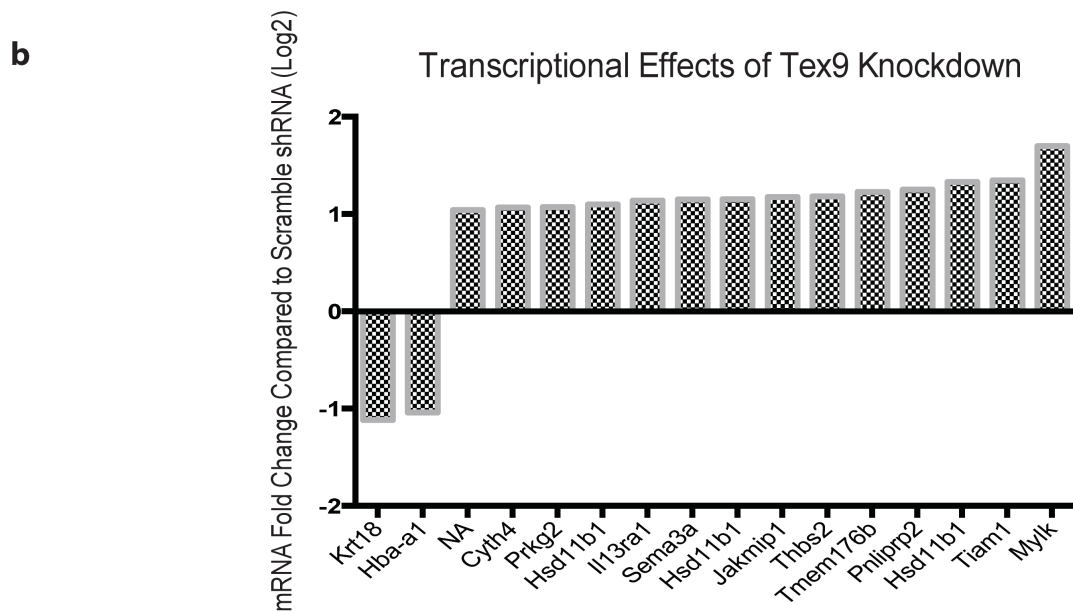

Supplemental Figure 9 Global Transcriptional Analysis of Pex14 and Tex9 shRNA mediated knockdown in EO771 cells. Illumina expression analysis of cultured EO771 shPex14 (a) and shTex9 (b) cells compared to shScramble cells. Differentially regulated candidates were considered significant if differential analysis indicated an adjusted p value (q value) < 0.05. N=3 illumina arrays per group. Illumina MouseWG-6 v2.0 Expression BeadChips were utilized.

Supplementary Table 1: Results from In Vivo Screen 1

| GeneBank  | shRNA Sequence               | BI6 vs NSG Log2 FC | BI6 vs NSG q Value | BI6 vs SCID Log 2 FC | BI6 vs SCID q Value |
|-----------|------------------------------|--------------------|--------------------|----------------------|---------------------|
| AI882525  | ACTGAATGTTTCCATGTGCCTCTCGTA  | -5.51              | 0.00526            | -3.72                | 0.139               |
| NM_053074 | GTGAATCCAGCGCTCCCTTGCAAGCTT  | -5.25              | 0.0612             | 2.03                 | 0.787               |
| BE950866  | ATACTTGACACACGTGCTCGTATATG   | -5.24              | 0.0167             | 0.354                | 0.902               |
| NM_008304 | TAACACTTGAAACAGTGTGTCTGA     | -5.02              | 0.0308             | 0.773                | 0.82                |
| BC027637  | ATTTCCAAGCTCTGCGGACATTTGTCC  | -4.91              | 0.0165             | 0.728                | 0.814               |
| BC027183  | TAACTGCTTGAAATCCTTATTGCTTA   | -4.78              | 0.0098             | -0.142               | 0.955               |
| AK014574  | ATTGTACGTGCAACTCTGCCTTTCCA   | -4.64              | 0.0182             | 1.23                 | 0.787               |
| BB471576  | TAGAATCCCAACTGCTCTATATTTCTT  | -4.58              | 0.0187             | -0.358               | 0.888               |
| NM_010406 | TAAAGCACAAGCTGATGAGTTACGACT  | -4.55              | 0.0098             | -0.183               | 0.939               |
| NM_025358 | CTTACCCTTTGCCACTATTTGTGTATA  | -4.54              | 0.0161             | 0.362                | 0.882               |
| AF011423  | TTTCTTACAAGCTTCTTCTGATCGTTG  | -4.49              | 0.000367           | 1.08                 | 0.726               |
| L35261    | TTTCTTGCCATTACAGCTAACATAGTA  | -4.49              | 0.00658            | 0.158                | 0.943               |
| NM_019781 | TTCCAAAGTCTGGCTGACAGATGCTG   | -4.4               | 0.00658            | -3.78                | 0.0549              |
| BB540053  | TTAACTATCTGGCCGGTCTCAAAGA    | -4.4               | 0.00526            | 1.09                 | 0.787               |
| AF011423  | TACAAGCTTCTTCTGATCGTTGTGGGT  | -4.38              | 0.00389            | 1.81                 | 0.615               |
| AF011423  | TCTTACAAGCTTCTTCTGATCGTTGTG  | -4.37              | 0.00329            | 1.89                 | 0.534               |
| M32308    | TAATCCAGAGACTGACTGCCTTTAGCC  | -4.33              | 0.0199             | 0.617                | 0.82                |
| BC011476  | TAATACTCTTCTCATATGCTACTCTCT  | -4.17              | 0.0167             | -4.3                 | 0.0549              |
| AW213665  | ACATCTGGCTGCAATGTGGACATTGG   | -4.17              | 0.00525            | -3.92                | 0.0337              |
| BB094901  | GATGACGTATTACTCTACACCTGATGT  | -4.16              | 0.0155             | -0.282               | 0.899               |
| AV319507  | TAAAGCCAACATATCAAATAGGGACA   | -4.16              | 0.00263            | -0.402               | 0.821               |
| BB818797  | TATAGCTTAACTGGCAGACTACTTGCC  | -4.16              | 0.0213             | 1.34                 | 0.787               |
| AV321315  | GAAGACAGACATCCTGGCAGTGAAGAC  | -4.13              | 0.00219            | -3.68                | 0.0171              |
| AF484555  | AGATGCAACCCACTGTAAGCTTTGTGA  | -4.1               | 0.0576             | 2.01                 | 0.776               |
| BG083329  | CACATGCATGCACTCACAGGTATATAA  | -4.08              | 0.0315             | 2.96                 | 0.418               |
| NM_009951 | GAAGATCCGAGACATCCTGGCTCAAGT  | -4.07              | 0.00526            | -3.14                | 0.0697              |
| BB241408  | TTAACTGATTTGACATCCTGTTCTAAT  | -4.07              | 0.00525            | -3.53                | 0.0466              |
| BG072196  | GTAACATGCTGACATCCTACTTTCATA  | -4.02              | 0.00609            | -3.45                | 0.0549              |
| NM_134086 | TGATCAGCATCCCTCTGGTCATCTACG  | -3.97              | 0.0161             | 2.5                  | 0.418               |
| NM_033354 | TCACATTCTGACATCTGGCTATCAAGT  | -3.97              | 0.000367           | -3.64                | 0.00364             |
| BE989942  | TCAGACCTGCTTTATATCTCAGAATAT  | -3.9               | 0.0444             | 0.0842               | 0.977               |
| AK005965  | GATACCTGGCTGACAGTGAACCGCATG  | -3.84              | 0.0315             | -3.42                | 0.17                |
| BC010204  | GTGTTGTCACTTACCCATTTATGTATG  | -3.83              | 0.0179             | -0.118               | 0.959               |
| BB197262  | TTACCAAAGAGCACTCTGCATGAGTTA  | -3.77              | 0.0163             | 0.242                | 0.906               |
| AK008551  | TACATTTGACATCGGACCAGTGGAGAT  | -3.76              | 0.000708           | -3.74                | 0.00364             |
| AK003436  | CTTCTTCATTGACATCCTGCTGGATAC  | -3.73              | 0.0165             | -3.13                | 0.139               |
| AF011423  | ACAAGCTTCTTCTGATCGTTGTGGGTT  | -3.73              | 0.00389            | 0.642                | 0.796               |
| BB144871  | TAATACATACTTGTAAACGTTCAAACAC | -3.7               | 0.0308             | -3.36                | 0.147               |
| AV094519  | GTGCTGACATCTGAGGATCTCTGTTTG  | -3.68              | 0.0142             | -3.56                | 0.0593              |
| BM207451  | AAGAAATAAATCCATCCTACTGTAACA  | -3.67              | 0.00526            | 1.13                 | 0.772               |
| AK016855  | ATAATGACATCTGGCTTACTCCGCCT   | -3.65              | 0.0114             | -3.26                | 0.064               |
| NM_009163 | ACAATTTGACATCTGGACTGGCTCCGT  | -3.58              | 0.000708           | -3.39                | 0.00418             |
| BM237177  | TTAGATAAAGTCTCTCCTCGTCACTCA  | -3.54              | 0.0626             | 1.4                  | 0.787               |
| BB021753  | TTGCATGATAAATCCATATGCTGTTTG  | -3.54              | 0.00166            | -0.025               | 0.987               |
| BB114693  | TTGGCATCTGTTTCTTTAATATGATA   | -3.54              | 0.000267           | 0.0305               | 0.977               |
| NM_018812 | GGGCTGACATCCAAGGTTTAGATTTAT  | -3.52              | 0.0136             | -3.29                | 0.064               |
| AY074806  | ACATCCACAAATCGCTGATCGGGAAGA  | -3.51              | 0.185              | 2.82                 | 0.742               |
| NM_053266 | TCATCCACGCTGTCCTGTTTCAAATAA  | -3.51              | 0.0171             | -0.00941             | 0.998               |
| NM_007799 | GAATTTAAATGTCTCACCTCTCATAA   | -3.5               | 0.0397             | 0.311                | 0.891               |
| BQ030867  | TGTACAGTCTGGGCATTTACATGTATT  | -3.49              | 0.0275             | -2.13                | 0.608               |
| BB114693  | TGGCATCTGTTTCTTTAATATGATAA   | -3.49              | 0.000267           | 0.371                | 0.79                |
| BC019126  | GTGATTTGCTTATATGCCTGAGAATAT  | -3.47              | 0.0444             | -0.255               | 0.912               |
| NM_029331 | TTTGCAAGCTGACCTGGCTGACATCAC  | -3.45              | 0.0097             | -2.51                | 0.147               |
| BC007193  | TCTCTCTTTGTGTATCTGAACCTTG    | -3.44              | 0.0245             | -0.265               | 0.895               |
| BB390252  | GAACCACGACATCTGGCTGAAGTTAG   | -3.44              | 0.00731            | -3.02                | 0.0549              |

Supplementary Table 1: Results from In Vivo Screen 1

| GeneBank  | shRNA Sequence               | BI6 vs NSG Log2 FC | BI6 vs NSG q Value | BI6 vs SCID Log 2 FC | BI6 vs SCID q Value |
|-----------|------------------------------|--------------------|--------------------|----------------------|---------------------|
| AK016924  | TCTACATTGATTGCCATGCTACTGTAA  | -3.43              | 0.0486             | 2.97                 | 0.296               |
| BC016523  | TCAGTGCTCAGCACTGCCATAAATAAA  | -3.41              | 0.00537            | 0.526                | 0.801               |
| AK002762  | ACATCACTGACGCTGCTCATTGTCATA  | -3.41              | 0.0315             | 1.92                 | 0.699               |
| BF141076  | ATAATAAGCTCACTACTTGGCTATTGT  | -3.4               | 0.0779             | 1.23                 | 0.787               |
| BE952060  | ATGTACTGTGACATCCCTGGCTTCTGT  | -3.4               | 0.00515            | -2.65                | 0.064               |
| BB119196  | TTGCATGTAAATACCATATGCTGTTTG  | -3.4               | 0.000935           | 0.187                | 0.868               |
| NM_011837 | CCAGGAGTCCAGACATCCTGGCAGGAA  | -3.39              | 0.0101             | -2.54                | 0.142               |
| BB448377  | CCTGCTCCTTGAACATTACCAAAGAGA  | -3.38              | 0.00166            | 0.77                 | 0.787               |
| NM_021504 | TTAAATGCTAACTTCTGCTGTGATTA   | -3.37              | 0.121              | 2.25                 | 0.749               |
| AK006106  | GAGACTCAAAGCTGCTCGGAACTTCT   | -3.33              | 0.00658            | -4.09                | 0.00924             |
| BB426699  | TAAACACCTCTATAGCCACTGAGCTAA  | -3.3               | 0.0218             | 1.12                 | 0.787               |
| AV297525  | GTACAATACTCTGACATCCTACCAGTA  | -3.28              | 0.0195             | -2.85                | 0.139               |
| AV127111  | TCTCATCCTGGCTGAACTGGTTGACTA  | -3.28              | 0.0158             | -2.76                | 0.139               |
| AK004342  | ACATCACTGACGCTGCTCATTGTCATA  | -3.26              | 0.0438             | 1.93                 | 0.715               |
| BC021322  | TTACATCCTGACATCTGAAATCTAGAA  | -3.25              | 0.0469             | -2.62                | 0.392               |
| BB114693  | GTTGGCATCTTGTCTTTAATATGAT    | -3.23              | 0.000702           | 0.0556               | 0.96                |
| AV334508  | CACCTTCTCTTGTCTGTTATTTATTG   | -3.19              | 0.00537            | -3.61                | 0.012               |
| NM_009979 | GAGGCTTCAGCTGCGTAGAACCATATG  | -3.17              | 0.0483             | -1.03                | 0.787               |
| BB166245  | TAATGACATCTGGCAACTATCCACACT  | -3.17              | 0.0097             | -3.06                | 0.0489              |
| BB375259  | TCAGATAAGGTTTCCAGTATGTTCCA   | -3.14              | 0.0394             | -0.354               | 0.862               |
| BB436898  | TTCTTGACATCTGGCATTTCATATAT   | -3.14              | 0.0241             | -2.61                | 0.175               |
| BI695763  | CAAATGACATACTGGCTGCTTACCTGT  | -3.11              | 0.0145             | -2.56                | 0.139               |
| AV038578  | TTTGGTGTCCCGCAGCCATATTGTAT   | -3.09              | 0.0421             | 1.67                 | 0.749               |
| BM249286  | AAATATCTGTGTAACCTATTGAGCATT  | -3.08              | 0.00637            | 2.08                 | 0.147               |
| NM_019712 | TTTGGTGTCCCGCAGCCATATTGTAT   | -3.07              | 0.0315             | 1.11                 | 0.787               |
| BE853428  | CAATGACTCCTGTATTTCTTATGAATAA | -3.06              | 0.0483             | 1.01                 | 0.787               |
| BE553944  | ATGATGAGACATCTGGCTACTACTATG  | -3.03              | 0.0141             | -2.44                | 0.139               |
| BB448377  | GCTCCTTGAACATTACCAAAGAGAATG  | -3.01              | 0.00166            | 0.687                | 0.787               |
| BC021897  | TATTTGTTAAACTTGGCTAATGTTAAA  | -2.97              | 0.00219            | 0.356                | 0.806               |
| BC002077  | GTAATCCTTGTGCTTTCTGATACCA    | -2.96              | 0.00839            | -0.129               | 0.93                |
| BB357650  | TATTTGCTACTGGATTACATAATTTGAA | -2.96              | 0.00839            | 1.29                 | 0.688               |
| AK010892  | TGGCTGACATCAACCAGACTCATA     | -2.95              | 0.0353             | -2.77                | 0.147               |
| BB448377  | CTGCTCCTTGAACATTACCAAAGAGAA  | -2.95              | 0.00334            | 1.57                 | 0.274               |
| BB357650  | TTTGTCACTGGATTACATAATTTGAAAG | -2.92              | 0.00703            | 1.33                 | 0.626               |
| AV274103  | CAATCATTCTGACCCATGGCTGACACT  | -2.88              | 0.0289             | -2.32                | 0.265               |
| NM_019712 | TTGGTGTCCCGCAGCCATATTGTATT   | -2.87              | 0.0334             | 1.39                 | 0.757               |
| AI788958  | TTCCTTGCTCTTCTCGACTGGTATGA   | -2.87              | 0.261              | 3.63                 | 0.546               |
| BC027270  | CAAATCCTTGGCTGACTTGACGGCAGT  | -2.85              | 0.0161             | -2.4                 | 0.139               |
| BE951633  | AGAAACTACATCCTGGCATCTTGGCTC  | -2.81              | 0.0151             | -2.02                | 0.236               |
| AK018207  | TAAACGACTGTATCGGGCTTACGCTGC  | -2.8               | 0.0315             | -1.74                | 0.615               |
| BI659732  | TGTCCTTTGACATCTGCCTTAAGACT   | -2.8               | 0.0259             | -2.5                 | 0.144               |
| AK016822  | TACTGCTGGGCGACTGTGGCTACTAGC  | -2.79              | 0.06               | 0.6                  | 0.809               |
| BB436898  | GACTTTCTTGGACATCTGGCATTTCAT  | -2.77              | 0.0315             | -1.97                | 0.438               |
| NM_026662 | GACATTTGATGATCCTGGCTGAAGCC   | -2.75              | 0.0259             | -1.82                | 0.496               |
| AK003436  | TTGACATCCTGCTGGATACCATCAGGG  | -2.75              | 0.0469             | -2.69                | 0.154               |
| AV292586  | TGTTCAACATGTCCCAATTTCTCCTG   | -2.74              | 0.0126             | -0.205               | 0.883               |
| BB478680  | TGACTGGCTCTTTCTTATGTTAATCT   | -2.74              | 0.000267           | -0.263               | 0.799               |
| BM293485  | ATAATCTGCCATATCTTTACATATTTG  | -2.73              | 0.0319             | -3.26                | 0.0549              |
| AW555571  | CTATACACCTTCTTCTACTCTGTTAAT  | -2.73              | 0.0291             | 0.11                 | 0.951               |
| AW548944  | TCTTGTTCAGCCTTGTGCATACCAAC   | -2.72              | 0.0259             | 3.3                  | 0.0453              |
| BC026782  | GTATAAGTAATCTCTGCATGCCAGACA  | -2.72              | 0.0394             | 1.62                 | 0.686               |
| BQ174980  | TTTAAACGTTTCGTTTGTACGGATGTAT | -2.72              | 0.00263            | -2.6                 | 0.0144              |
| AK017426  | CTGGGCACTGTGTCCTATAACTGTAAA  | -2.69              | 0.0255             | 1.23                 | 0.757               |
| BB556862  | AGTGTCCGGCAGAGGGCTTACGCCAGA  | -2.68              | 0.0444             | -1.02                | 0.787               |
| BC020138  | AGGTGACATCACTGGCTGCAGCTGAAG  | -2.65              | 0.0097             | -2                   | 0.139               |

Supplementary Table 1: Results from In Vivo Screen 1

| GeneBank  | shRNA Sequence              | BI6 vs NSG Log2 FC | BI6 vs NSG q Value | BI6 vs SCID Log 2 FC | BI6 vs SCID q Value |
|-----------|-----------------------------|--------------------|--------------------|----------------------|---------------------|
| AK016844  | ATCACAGTGAACATCCTGGCTATGTTA | -2.63              | 0.0315             | -1.84                | 0.487               |
| BE691677  | CAAATCGAACAAGCATATCTCCTATTA | -2.63              | 0.00217            | 0.835                | 0.742               |
| BG069303  | CTAATAGTTATCCTTAAATCTGTGTTA | -2.62              | 0.0238             | 0.188                | 0.902               |
| BQ175324  | GAGTTAGACCCTCACATCCTGGCTGTG | -2.61              | 0.0255             | -1.49                | 0.638               |
| NM_008716 | ATGCATTCCACTTCTAATTGTAAATAC | -2.6               | 0.00263            | 0.0975               | 0.925               |
| BC026950  | TAATTCCTATACCTTCTCTATCTTTAT | -2.58              | 0.0141             | -0.0809              | 0.956               |
| NM_011704 | ATACATCTTACTCAGTTATGCTTAGAA | -2.57              | 0.0517             | 1.01                 | 0.787               |
| NM_138651 | GGATTCTGACATCTGCCTTGGAAGATG | -2.57              | 0.0486             | -2.48                | 0.176               |
| NM_009610 | TGTGACATTGACATCCGCAAAGATTTG | -2.57              | 0.0213             | -2.32                | 0.136               |
| AV327200  | AGTACAGTTTGTCTTTAACTGA      | -2.56              | 0.0122             | -0.58                | 0.792               |
| BC015259  | TTATCACATCCTGGGCTGCATCTTAGC | -2.53              | 0.0141             | -1.84                | 0.205               |
| BM243546  | TCTAACATACTTCCATCAACAACCAT  | -2.52              | 0.00779            | -0.267               | 0.831               |
| AK008551  | ATTTGACATCGGACCAGTGGAGATCTC | -2.5               | 0.0329             | -2.26                | 0.17                |
| AF037046  | CAAACCTGCGGACATCTGCTCTGGGAA | -2.48              | 0.0288             | -2.25                | 0.144               |
| BG070811  | CTCAGCTCGTGGATTGTCTCTTTCTAA | -2.47              | 0.183              | 2.72                 | 0.397               |
| BE996326  | ACTTAACTATTAACACATCTCTCATT  | -2.45              | 0.117              | 1.36                 | 0.776               |
| BC007193  | TCTTTGTGTATCTGAACTTTCCTTTG  | -2.44              | 0.00731            | -0.413               | 0.801               |
| NM_021890 | AGAAGTCTGGCGACATCTGGCTGGATG | -2.43              | 0.0275             | -1.76                | 0.392               |
| BM211445  | TTGACATCCTAGTGCATCTGACAAGGA | -2.43              | 0.0381             | -1.98                | 0.305               |
| AW557946  | TGCACATCATCCGAAATGAACCTCTT  | -2.41              | 0.0151             | -1.45                | 0.466               |
| NM_011487 | TGACATCCTCGAGACTACAAGTTTAT  | -2.4               | 0.0315             | -2.08                | 0.204               |
| AY043275  | GTTTCTGACTGTCTGGTGCATCATTTG | -2.38              | 0.0465             | -1.07                | 0.783               |
| C85600    | GAAATCATTGTGTCTACTATG       | -2.38              | 0.0315             | -1.57                | 0.546               |
| BB794936  | TCTTTCACCTGCCAATCAGCTGTTAAT | -2.27              | 0.000367           | -0.0141              | 0.985               |
| NM_027722 | ATATGTTTATGTTCTGACTGCTACTGA | -2.26              | 0.023              | -1.06                | 0.749               |
| NM_020503 | ACAAGACATCCTGCTCAGAAGCCTGTA | -2.25              | 0.0255             | -1.82                | 0.219               |
| BB253461  | GTATGCTCACTATGCTAAATATTTAAA | -2.24              | 0.0259             | -2                   | 0.144               |
| BC023062  | CAACATCTGACATTTCCAGGCTTCTGA | -2.21              | 0.0195             | -1.93                | 0.139               |
| BC003255  | CAACAGTACCCTGACATCCCTGTGTGT | -2.2               | 0.0491             | -1.65                | 0.496               |
| BF320852  | CAAACACTAATGCATTTCCCTAACCTA | -2.2               | 0.279              | 3.57                 | 0.346               |
| AI481778  | TGTGGACATCTGACAGCCTCTTCTGAC | -2.19              | 0.0444             | -2                   | 0.217               |
| AK013582  | TTGGACGTGATGCTGCTCATTGTCAT  | -2.16              | 0.0129             | -0.165               | 0.881               |
| BB534766  | AGGACATGCTGCTGGACATTTACTT   | -2.15              | 0.0315             | -1.87                | 0.196               |
| BB480659  | TTGACTCCTGGCTGCTCCGAGAATGGG | -2.1               | 0.0421             | -1.78                | 0.284               |
| BC009096  | TAAAGAATTTATTACACCTCAGGAGCA | -2.08              | 0.0192             | -0.446               | 0.799               |
| BG071064  | AAGACCATTTGACATCAGTCATGGAGA | -2.08              | 0.0255             | -1.49                | 0.389               |
| BB328920  | TATTTCTCTTACAATTGGCTCCTTC   | -2.08              | 0.025              | -0.111               | 0.93                |
| AK004139  | AAGAATTTGACAACCGGCTGGCTGTC  | -2.07              | 0.0315             | -1.7                 | 0.274               |
| NM_013626 | TTAGTTACTTCATTTGGCTCCGTTGGC | -2.06              | 0.00119            | -0.0237              | 0.976               |
| BB516678  | CAAGGCCATGATCCTGGCTGACCATAT | -2.03              | 0.0353             | -1.56                | 0.389               |
| NM_024206 | ATCACAGCCAACATCCTGGCTGTGTCA | -2.02              | 0.0491             | -1.24                | 0.694               |
| NM_016760 | CTTCAACTGTGTTCTCCCTGGCATTCA | -1.99              | 0.0476             | 0.0213               | 0.99                |
| BI790311  | TAACCTTTGACATCACAGTCCCTTCCA | -1.98              | 0.0255             | -1.71                | 0.154               |
| AK017008  | CATCCTGGTACTCTGTTGTCAGACAC  | -1.97              | 0.0141             | -1.87                | 0.064               |
| AF078667  | AGAGGATCACGCTGCTCCGACAGGTGG | -1.94              | 0.00329            | -0.583               | 0.764               |
| AK006136  | TCCCTCACAGACATCCTGGTGTGGTCA | -1.94              | 0.00389            | -1.29                | 0.128               |
| BB153779  | AGCTTCTTGACATGGCTGACAACAAAT | -1.94              | 0.0182             | -1.43                | 0.254               |
| BI151889  | TCTTACGAGAGACATCCTGGAGGTGTG | -1.92              | 0.0275             | -0.949               | 0.749               |
| BB354528  | TATTGTTACACATCAAGCAATCAATAA | -1.89              | 0.0329             | -0.111               | 0.927               |
| BB453395  | CCAACATCCAGGCTGACTACCTGTACC | -1.88              | 0.0199             | -1.52                | 0.171               |
| AK006136  | AGACATCCTGGTGTGGTCAGACACAGC | -1.79              | 0.0383             | -1.59                | 0.212               |
| AW557946  | ATCATCCAGAAATGAACTCTTGTAGA  | -1.78              | 0.023              | -0.793               | 0.757               |
| AK015837  | GAATGACATCATGGCTAGCTCAAGTAA | -1.69              | 0.0291             | -1.24                | 0.389               |
| AW107953  | CAATCAAAGCTGCTTCCAGAAATGA   | -1.69              | 0.0337             | -2.15                | 0.0466              |
| NM_010643 | GAATGATGACATCCCGAACCTAAGGA  | -1.66              | 0.0483             | -1.26                | 0.477               |

Supplementary Table 1: Results from In Vivo Screen 1

| GeneBank  | shRNA Sequence               | BI6 vs NSG Log2 FC | BI6 vs NSG q Value | BI6 vs SCID Log 2 FC | BI6 vs SCID q Value |
|-----------|------------------------------|--------------------|--------------------|----------------------|---------------------|
| BC019425  | CTGACATGCCTGGTGGCAGCTTTCAAC  | -1.66              | 0.0483             | -1.42                | 0.3                 |
| BB560492  | TAACATCTGACTTAATATGCATTTA    | -1.65              | 0.268              | 2.12                 | 0.565               |
| BM211317  | TATCTGTATAACTCAGTAGCCACTGAA  | -1.62              | 0.0431             | -1.39                | 0.282               |
| BB560492  | TAACATCTGACTTAATATGCATTTA    | -1.62              | 0.231              | 2.33                 | 0.24                |
| BF470301  | TGGGATGACATCCTGCAGCTCTGCA    | -1.6               | 0.0289             | -0.914               | 0.686               |
| NM_007808 | ATCTCCACGGTCTGTTCCGGGCGGAAGA | -1.53              | 0.0458             | -0.526               | 0.787               |
| BG069498  | TGGACGAATGCAGGGATGAGCACAAAG  | -1.53              | 0.0337             | -1.59                | 0.0988              |
| NM_010916 | TCTTTGTCTGGTTGCATTCTAATTC    | -1.52              | 0.346              | 3.16                 | 0.418               |
| BC020106  | ATTTCCCTTGGCTGACACCCAGGTA    | -1.5               | 0.0386             | -1.01                | 0.565               |
| C78652    | GGTTTCATTGGCACCATCCACACGCT   | -1.49              | 0.0165             | -0.649               | 0.749               |
| NM_138581 | ATCCTGGCTGAGATCTCCAGAACTA    | -1.49              | 0.0255             | -1.26                | 0.17                |
| NM_010581 | AGAATGCTTCTGGACTTGGCCTCATTG  | -1.49              | 0.0328             | -0.66                | 0.772               |
| AK008922  | ATGCAGTCATGGACACCTGGCTGAAG   | -1.49              | 0.0151             | -1.21                | 0.139               |
| NM_007922 | ATTATTCCTGGCTGTATCTGAGTCCAG  | -1.48              | 0.0483             | -1.06                | 0.546               |
| BB620492  | TAATATGGTTCTGATCTGTCATCTCAT  | -1.48              | 0.0195             | -0.355               | 0.795               |
| L29457    | TGGACGACTCCTGGCTGCAGGTGCAGA  | -1.41              | 0.0429             | -1.2                 | 0.284               |
| BB105833  | CAGCATGTGGCTGGCTGACATTCTGTG  | -1.4               | 0.00389            | -0.854               | 0.147               |
| AK013228  | GCCACTGTTCTTGCATTTCTCATAAA   | -1.39              | 0.0308             | 0.0365               | 0.971               |
| NM_010643 | GATGACATCCCGAACCTAAGGACAAG   | -1.38              | 0.0315             | -1.45                | 0.0839              |
| NM_021408 | CATGAGACTCCCTGGCAACATCTGAGT  | -1.37              | 0.0296             | -0.765               | 0.686               |
| NM_133816 | TGGACATCCTGAGGGCAGCTGCCTTCA  | -1.36              | 0.0218             | -0.913               | 0.411               |
| AV317245  | AAGTAGTTCTGTAGTTAGACTTCATAA  | -1.34              | 0.315              | 2.4                  | 0.444               |
| BG067040  | AAACTACGCTGACCTTTGGACCAGTGA  | -1.33              | 0.0181             | -0.401               | 0.787               |
| AV062214  | CATGCTGGACATCCGGGCGAGCTTTAA  | -1.32              | 0.0115             | -0.838               | 0.311               |
| AF302138  | AGAGCATCCCGACTTGGCAGCTGAGC   | -1.25              | 0.0305             | -0.916               | 0.396               |
| AA175822  | TATGGTCATCATTAGACGCTGGAGGT   | -1.13              | 0.0269             | -0.304               | 0.792               |
| NM_025338 | CTTGCTGCTTCTGACCCACTATAATAA  | -1.1               | 0.0255             | -0.0905              | 0.89                |
| BG076284  | AGGCTAAGGGCGTTCAGTCTGCTGCAA  | -1.08              | 0.0141             | -0.219               | 0.799               |
| NM_008225 | GCAAGGACCTGGCTGAACATCATGAGA  | -1.04              | 0.0444             | -0.902               | 0.282               |
| AJ131395  | TGAGGAACTACCTCCTACTTGTAA     | -1.02              | 0.0434             | -0.176               | 0.817               |
| BB457749  | TGAGAAATGGCAATACCTTCATGGTAT  | 0.315              | 0.357              | -0.807               | 0.229               |
| AK014712  | GTTCTATCACACACCAGGTTCTGTTGA  | 1.19               | 0.0315             | 0.885                | 0.396               |
| NM_009994 | ATGTTCTCAGAGTATCTACTTCAGAT   | 1.27               | 0.0386             | 1.21                 | 0.147               |
| AW536361  | TTAGTACTGTAACTGCTTCTGAGCAA   | 2.36               | 0.0467             | 2.62                 | 0.0966              |
| BB195657  | AAACATTCTGTTAGCTATCAATATAA   | 2.99               | 0.0145             | 3.54                 | 0.0253              |
| NM_010945 | AATGTGTGGTTCAACTTCCTAAATCA   | 3.99               | 0.0315             | 2                    | 0.749               |
| BB131956  | TGACCTCCACCTGGTCCGGTGATCCC   | 4.04               | 0.0308             | 4.18                 | 0.0893              |
| AF083876  | GAGAGAGGTTCTGCTGACGTCCATCA   | 4.14               | 0.00901            | 2.98                 | 0.147               |
| NM_009359 | GGTTCTTCACTCAGCATCAAGAGAGAT  | 4.22               | 0.0206             | 5.07                 | 0.0337              |
| BC011117  | TGACCTCCACCTGGTCCGGTGATCCC   | 4.22               | 0.0205             | 4.15                 | 0.0739              |
| NM_009359 | ATCCTGGTCTTCACTCAGCATCAAGA   | 4.65               | 0.033              | 5.49                 | 0.0549              |
| BB451412  | TAACAAACCTCAACTAAGCCCACATCT  | 5.13               | 0.00731            | 5.09                 | 0.0337              |
| AW492190  | TAGATTTCTGTTGACCTACACGATCT   | 5.38               | 0.0145             | 0.643                | 0.829               |
| NM_139059 | AGTCAACGTCTCCTCATCTGATCTCAC  | 6.58               | 0.0403             | 4.77                 | 0.491               |
| BG070374  | AGTTCATGGCTACTTACTCGATTCTCT  | 6.7                | 0.000367           | -0.466               | 0.823               |

Supplemental Table 2: Results from In Vivo Screen 2

| GeneBank  | shRNA Sequence               | BI6 vs SCID Log2 FC | BI6 vs SCID q Value |
|-----------|------------------------------|---------------------|---------------------|
| BM230211  | ACTTATGCCAAATCAGTTGTGTTTCAG  | -6.18               | 0.0014              |
| BC019509  | ATCGGTGTTTCGGTCAGTAATGCTTAAG | -5.81               | 0.015               |
| AU015121  | AGATGCTGCATACTTGTTCTTGACAGT  | -5.8                | 0.00871             |
| BC019407  | CAACCCAGTACCTGACTACGAGCTTAA  | -5.76               | 0.000408            |
| BI156474  | GTAAAGCAACTATACCTTCAGTTTAAA  | -5.74               | 0.000142            |
| BB813490  | GTTATCTGACCTGGCTACAGATTGAC   | -5.7                | 0.000149            |
| AI507538  | CGTGGTGGATATGTGAACTTCTGTGTA  | -5.5                | 4.29E-05            |
| BG916808  | TTGAACTGCCAACGTCCAGACAACTCA  | -5.4                | 0.0154              |
| AF477481  | GTTTCTTTTCATCAGTACACGACGCACT | -5.15               | 0.0243              |
| AK009774  | AGGACCACATCATCACGAGCTGATTCA  | -5.05               | 0.0187              |
| NM_009849 | GAGTGGAGCCTCTGTTCTGATTGATCT  | -5.04               | 0.014               |
| NM_138648 | ATGTTATCACTGTCTGTACAATTTCTG  | -4.83               | 0.00712             |
| NM_009420 | TAGTGACATGTCACATCCCAAATGACA  | -4.8                | 0.0306              |
| AV167877  | TTACACCAGCATGTGCTTGAAATCAG   | -4.8                | 0.0168              |
| NM_023323 | AGGCAGGTACCACCATATACAGCATAT  | -4.71               | 0.0493              |
| AA267016  | TGGTCTGTGCTCATGAGAGCGATGCTT  | -4.68               | 0.0407              |
| AV326297  | TAATAACCCAAAGTCCACATACTGCAC  | -4.64               | 0.04                |
| BB637556  | GAACCTCTGTTACACTCATGCAGTAAA  | -4.62               | 0.0312              |
| BB259151  | GTAACTTCCTCACTGATTATCAATGT   | -4.49               | 0.0453              |
| BB128997  | TCATTACCCACATTCTGCAACTTTGTC  | -4.46               | 0.015               |
| AK005395  | TAGACCTCCAGACTACCTGTATGACAC  | -4.44               | 0.0256              |
| BB369191  | GGTATTGTGCATTTGTGGCATTATGTA  | -4.43               | 0.0152              |
| AV326297  | TTAATAACCCAAAGTCCACATACTGC   | -4.42               | 0.0436              |
| BQ175524  | ATTCAGAAGCACTAGCAGCACTTTAA   | -4.38               | 0.0152              |
| BQ175524  | GAAATCATTGTGTCATTGTCTACTATG  | -4.37               | 0.032               |
| NM_019447 | CATGACCTTGCTTGATCCGGCTAAAG   | -4.34               | 0.0388              |
| AJ300674  | GATTGGAAC TTGTGGATCTCCTTTCAA | -4.31               | 0.00531             |
| AK016773  | ATTACCTCCATGTCATGTCTCTGTACA  | -4.28               | 0.00867             |
| BQ175905  | AGCATGCAGACTGCTCTGTTCTCACCA  | -4.23               | 0.0196              |
| BB032062  | GTTCATACATGTCAATCTACCTCGTGT  | -4.22               | 0.000793            |
| BC008538  | GAAACCTTTGGTCATGCGCCTGTGTGA  | -4.22               | 0.0198              |
| AF136449  | ACACTACTGTTTGTTCCTAGCTAGTC   | -4.2                | 0.0447              |
| AV265433  | GTACTCCTCGCATCTCGAAAGTTATAA  | -4.17               | 0.015               |
| BG068961  | GAAGCTACTTCTCCAATGCATTGCAA   | -4.15               | 0.0115              |
| BM935724  | TTTATTGCGTACTCTACCTGTGTAAAT  | -4.13               | 0.0164              |
| AW543416  | GAATGTCCATAGCATTATAATCGCTTA  | -4.07               | 0.0191              |
| AK006106  | GAGACTCAAAGCTGCTCGGAAACTTCT  | -4.07               | 0.0353              |
| AV167877  | ACCATTACACCAGCATGTGCTTGAAA   | -4.06               | 0.0264              |
| NM_007514 | TAAATCATCCATTACTTTCAGAACACA  | -4.02               | 0.0462              |
| AW552018  | ATCCTGGGCAACTGATATCTGTACAAA  | -4.02               | 0.0492              |

Supplemental Table 2: Results from In Vivo Screen 2

| GeneBank  | shRNA Sequence               | BI6 vs SCID Log2 FC | BI6 vs SCID q Value |
|-----------|------------------------------|---------------------|---------------------|
| BB369191  | GAAACGGTATTGTGCATTTGTGGCATT  | -4.01               | 0.013               |
| AK017027  | ACAAGACTTGCATCGATCCCTGGCTTT  | -4                  | 0.0211              |
| AK008551  | TACATTTGACATCGGACCAGTGGAGAT  | -3.91               | 0.0171              |
| AV167877  | GAACCATTACACCAGCATGTGCTTGGGA | -3.91               | 0.0499              |
| NM_007823 | CATTCCTTCACTCCACAAATATTTGCT  | -3.9                | 0.00639             |
| BB253461  | GTATGCTCACTATGCTAAATATTTAAA  | -3.89               | 0.0166              |
| NM_013827 | CAAACGAAACTACCTCGGCTAGCATTT  | -3.87               | 0.0164              |
| BC008538  | TTGGTCATGCGCCTGTGTGATTCTATT  | -3.86               | 0.0264              |
| AK003744  | TCTACTACTTCCGAGACACCAAAGTCA  | -3.85               | 0.0282              |
| C85600    | GTCATTGTCTACTATGTCTTCTAGAAA  | -3.85               | 0.0208              |
| NM_008825 | GAAGGAACAGCTTTACGCCTCTGTCCA  | -3.82               | 0.017               |
| BG071917  | ATTGGATCAGTCCATAGCTACCCACAT  | -3.8                | 0.0234              |
| AK004834  | GAATTAAGTGGTCTGTTTCCTTCATCT  | -3.75               | 0.0117              |
| NM_053143 | TCATGCTTATAGTTCCAGGACAATAG   | -3.73               | 0.0141              |
| BB424644  | CATGAAGGACTGTTTAACTTATTTCT   | -3.73               | 0.0212              |
| AY065557  | GACATATGATCTCCATGATCCTAAGAA  | -3.64               | 0.0375              |
| BB126973  | TAAATGTTCTGTAAATGTACCCTGGTA  | -3.58               | 0.0262              |
| NM_021892 | GCTTCTTAACATCAAACACCTTCTGTA  | -3.57               | 0.000112            |
| NM_011339 | AAGCCTCTATATCTTTCATTTGGGAGA  | -3.51               | 0.0236              |
| NM_010062 | GTGTAACAACATCACATACTTCTGAAA  | -3.5                | 0.0337              |
| AW492270  | CTATTCACAGGAGCCAATGTCCATACT  | -3.46               | 0.0191              |
| NM_016710 | ATGCCTAACATGACACCTTATACATT   | -3.44               | 0.0305              |
| AK012122  | CTAAATACTGTCTGTACTAACTGTAT   | -3.44               | 0.0164              |
| AV293314  | ATACCTCATGCCTTCCACAGACATTCC  | -3.43               | 0.0353              |
| NM_023773 | AGCTCAAATGTTCTACCTAGTTGTAA   | -3.41               | 0.046               |
| NM_013519 | ATGTGATCTCAGTGTGTTGATTTACCTT | -3.4                | 0.0105              |
| AV139714  | ATATGACATCAGCTTCTCATCACCAA   | -3.39               | 0.000337            |
| NM_024244 | CTCTCTGTATTCACCTGCTGTTTATGA  | -3.36               | 0.0374              |
| BE553782  | TAATTCTTATCTGCATGTATTAGTTAA  | -3.34               | 0.015               |
| NM_026160 | GTAAGGATTCTGTAAATACTGCTTTAA  | -3.32               | 0.037               |
| NM_031251 | TTGCACACAAAGATACCACAGTACCTT  | -3.32               | 0.0285              |
| NM_019781 | TTCCAAAGTCCTGGCTGACAGATGCTG  | -3.31               | 0.0228              |
| BE291900  | CAAGTGCTATGCCGTGAAGATATTTCA  | -3.28               | 0.0341              |
| BG069355  | TAACCTTATACTTGAACCTACCTGCTAA | -3.2                | 0.0312              |
| NM_011890 | ACCAGCAATGCTACCAGTGACTTAAAC  | -3.17               | 0.0184              |
| AW492270  | TTCACAGGAGCCAATGTCCATACTGAC  | -3.17               | 0.033               |
| BB314393  | ATGATTCTAATCTCCGGAGGGTGCTAG  | -3.16               | 0.0136              |
| BB465277  | CCTTTGTTTCTCATGCTATACTTTGAA  | -3.15               | 0.0115              |
| AV321315  | GAAGACAGACATCCTGGCAGTGAAGAC  | -3.14               | 0.0259              |
| BB465277  | CCTTTGTTTCTCATGCTATACTTTGAA  | -3.12               | 0.0312              |

Supplemental Table 2: Results from In Vivo Screen 2

| GeneBank  | shRNA Sequence               | BI6 vs SCID Log2 FC | BI6 vs SCID q Value |
|-----------|------------------------------|---------------------|---------------------|
| BC020141  | TAACAACATTATGTAAGTCCATATGTA  | -3.11               | 0.0337              |
| AF004858  | GTTTACAGTGTCATCATCCACACGCTG  | -3.11               | 0.0224              |
| NM_009163 | ACAATTTGACATCTGGACTGGCTCCGT  | -3.08               | 0.0234              |
| NM_033354 | TCACATTCTGACATCTGGCTATCAAGT  | -3.08               | 0.0153              |
| BM233292  | TTACTATCCACACCTAATGCTGAAGC   | -3.06               | 0.0357              |
| NM_011866 | GAAGCTCTCACTTCAAACCATGTCAA   | -2.99               | 0.0353              |
| AV281802  | TAAATGACCTGAAGGGTTACCATCACA  | -2.98               | 0.0402              |
| AK012122  | TAAATACTGTCTGTACTAACTGTATA   | -2.97               | 0.0204              |
| AV378604  | GTTATCTGTAAGTGCATTGTCATAAG   | -2.95               | 0.00598             |
| AF004858  | TTTACAGTGTCATCATCCACACGCTGC  | -2.94               | 0.0173              |
| BB309956  | AGATCTAGATTACCCTAAGAATGTAA   | -2.93               | 0.0103              |
| AK017426  | CTGGGCACTGTGTCCTATAACTGTAA   | -2.89               | 0.0122              |
| AF004858  | TTACAGTGTCATCATCCACACGCTGCT  | -2.87               | 0.0238              |
| AF037046  | CAAACCTGCCGACATCTGCTCTGGGAA  | -2.84               | 0.0144              |
| AF004858  | TACAGTGTCATCATCCACACGCTGCTC  | -2.82               | 0.0321              |
| BC023403  | TTTAGTCCCTCTTTGAGGACTTTGTGA  | -2.76               | 0.0376              |
| BG093687  | GAGTAAATAATATCTTACCAGACTTAA  | -2.76               | 0.000568            |
| NM_020586 | AAATATGCTGGAAATTGCTCCCTGTAA  | -2.74               | 0.0188              |
| BM238998  | TAAGGTTCTTATCTCTTCTTACTAAA   | -2.74               | 0.036               |
| BE136101  | TAGACATCTGGAATAAGAATCTGTATT  | -2.73               | 0.0264              |
| BB231137  | TTTATGGCCTCTCTTTGTGCGAACATG  | -2.73               | 0.0308              |
| BC011476  | TAATACTTCTCATATGCTACTCTCT    | -2.72               | 0.0462              |
| AK013740  | TTTCTTATATCTTCTAGGGTGTGTTTG  | -2.72               | 0.0251              |
| NM_008634 | CAGTCTACTTAATGCTGTGAATCACAT  | -2.68               | 0.014               |
| NM_017393 | CTACGACACAATGCAGTACATCCTGAA  | -2.66               | 0.0392              |
| BG070419  | TTTCCTATTGCATGTCACCTCCCAAAT  | -2.65               | 0.0431              |
| BE986833  | AAGTGAACCTTATTCTGTTACTAGAGAT | -2.63               | 0.0378              |
| BC006680  | TAAGCTGTTAACAAGTTTCATTGCACT  | -2.61               | 0.0474              |
| BQ176814  | ATTAAATAAAGTACACTGTGGTCATTT  | -2.61               | 0.0423              |
| BB828144  | TTCAGGCTCTAGTAGGTTCCAATTAAT  | -2.61               | 0.0475              |
| BG072054  | TACCACATCATCACAGAGCCAACTTAT  | -2.6                | 0.0464              |
| NM_010062 | ACAACATCACATACTTCTGAAATAGGA  | -2.59               | 0.015               |
| NM_010788 | TCATGTGGACAGTTCTACCTGTAGTGA  | -2.58               | 0.0254              |
| AK005965  | GATACCTGGCTGACAGTGAACCGCATG  | -2.55               | 0.0427              |
| NM_021468 | ACATTGTCCACAATGCGCCAGTCAACA  | -2.52               | 0.0307              |
| AF004858  | TGAGCAGCGTGTGGATGATGACACTGT  | -2.52               | 0.0498              |
| NM_010062 | GTAACAACATCACATACTTCTGAAATA  | -2.48               | 0.0153              |
| AI594675  | GTAACTAAACTCACAAATATCTACTGAA | -2.47               | 0.0211              |
| BE853428  | CAATGACTCCTGTATTCTTATGAATAA  | -2.44               | 0.0436              |
| BC007159  | TGCTTCCCTGTAGGTGCAACAACATTA  | -2.43               | 0.0201              |



Supplemental Table 2: Results from In Vivo Screen 2

| GeneBank  | shRNA Sequence              | BI6 vs SCID Log2 FC | BI6 vs SCID q Value |
|-----------|-----------------------------|---------------------|---------------------|
| BB465277  | TAAATCCTTTGTTTCTCATGCTATACT | -2.43               | 0.0173              |
| BC007159  | TCTGCTCCCTGTAGGTGCAACAACAT  | -2.42               | 0.0311              |
| BC007159  | TCTGCTCCCTGTAGGTGCAACAACAT  | -2.42               | 0.027               |
| BM118719  | AGGCTGGCAATCACGGCCGACATAAAT | -2.41               | 0.0122              |
| AV094519  | GTGCTGACATCTGAGGATCTCTGTTTG | -2.41               | 0.0253              |
| BG069418  | TAAACAGTTATACCTCTTCCTTCTTTA | -2.39               | 0.0117              |
| BB125490  | CACTGTTGGCATTACTATATTCACAA  | -2.34               | 0.0253              |
| BE197115  | ACTTCTGACTTCCATATTCTTATCTA  | -2.33               | 0.0308              |
| NM_009627 | GGCTCATGCCAGAAACCGAGACTTACA | -2.3                | 0.0262              |
| BC007159  | TCTGCTCCCTGTAGGTGCAACAACAT  | -2.29               | 0.0297              |
| BB465277  | TAAATCCTTTGTTTCTCATGCTATACT | -2.27               | 0.0402              |
| BC020138  | AGGTGACATCACTGGCTGCAGCTGAAG | -2.26               | 0.023               |
| AK005123  | CAACACCTGCCTTTCATACTATAATTG | -2.26               | 0.0141              |
| AV109882  | TGGTAACTTACGTGCCTGTTACCACAT | -2.23               | 0.037               |
| BC007159  | TGCTTCCCTGTAGGTGCAACAACATTA | -2.21               | 0.0281              |
| BC007159  | TGCTTCCCTGTAGGTGCAACAACATTA | -2.2                | 0.0227              |
| BC021528  | TTGAATTATGTCCTGCTTCCAACCAGA | -2.19               | 0.00986             |
| BB224338  | ATTGAATTGAGATCTCTAGAACCCATA | -2.17               | 0.0496              |
| BG069704  | TTAAGCCAGCTTGTCTATAAATAGGC  | -2.16               | 0.00821             |
| BG067040  | AAACTACGCTGACCTTGGACCAGTGA  | -2.13               | 0.000112            |
| BG798172  | TAAGTCATTAATACCTAACTAGAATGT | -2.12               | 0.0425              |
| BC019366  | CAAACATTAATATCCATGCCATATCAT | -2.09               | 0.0495              |
| BG067575  | AGATGCCTTGTCTCCATGCTGACAGCT | -2.05               | 0.0166              |
| AK016319  | AGAACGAACCCTTTCAGACAGAAATC  | -2.02               | 0.00792             |
| BB667930  | GTTGTTACCTCCACATAAATGTCTTAA | -2.01               | 0.0065              |
| AK003436  | CTTCTTCATTGACATCCTGCTGGATAC | -2                  | 0.0152              |
| L40172    | GAGTGGTGTGTACGAGCTCTTCACCT  | -2                  | 0.00159             |
| NM_031176 | GAAAGGAAGCCGTGTTGCCCCAGTATG | -2                  | 0.0292              |
| BB400852  | CCAGCTTCTGAGCACGGAACCATTGT  | -1.99               | 0.014               |
| BB245565  | TGCCTTGGTTCTCTCAAGACTTGGAGT | -1.99               | 0.027               |
| BC010709  | TGAATGCAACCAACATCGAGCTAGCCA | -1.94               | 0.0359              |
| NM_018812 | GGGCTGACATCCAAGGTTTAGATTTAT | -1.93               | 0.0417              |
| AI464159  | ATGTCAGCTTATAAGGTGCATCATTAT | -1.93               | 0.0456              |
| AW550677  | ATGGGCCTGCCTTCACTCCAAGTACT  | -1.93               | 0.0433              |
| AF288378  | TAATAATTCCCACTACTGTATTTGTGG | -1.91               | 0.0464              |
| BB228135  | AGAACTTCACTTGCTTCTACAGATAA  | -1.91               | 0.0311              |
| BC021528  | GAATTATGTCCTGCTTCCAACCAGAAC | -1.89               | 0.00892             |
| BB015570  | CATGTAACCGGAACCCATCTGAGTTAT | -1.86               | 0.0158              |
| BC027174  | TTCCCAGGACGACAGATGAGCAGGAGA | -1.83               | 0.0264              |
| BB465134  | GATTTGTTTCTGTTATTGACTTGAGAT | -1.83               | 4.29E-05            |

Supplemental Table 2: Results from In Vivo Screen 2

| GeneBank  | shRNA Sequence               | BI6 vs SCID Log2 FC | BI6 vs SCID q Value |
|-----------|------------------------------|---------------------|---------------------|
| AV336439  | TAAACTTAACTTCTGGATTTAGTATAG  | -1.83               | 0.0409              |
| AV113441  | TATTCCTCATCTCTATAACTCTAGAA   | -1.82               | 0.0305              |
| BB390252  | GAACCACGACATCTGGCTGAAGTTAG   | -1.81               | 0.0299              |
| BB344763  | ATGTATTATTGTTGTTGACCCACCTCT  | -1.8                | 0.00892             |
| BG068932  | CCCAAATTCTTGGACGGTGTATTGTGA  | -1.8                | 0.0208              |
| BI153474  | AATTACTTGAAGAATTTGCCTGCTTTA  | -1.79               | 0.046               |
| AK015602  | TGAAATTTGCACAGACCCGGCCGAGGG  | -1.79               | 0.0436              |
| BB740802  | CTCAGCTCAGGTCTGCAAGACACATAC  | -1.79               | 0.0462              |
| AK006835  | AGTTGACATTTGATCCTGGTACAGTAG  | -1.75               | 0.00358             |
| BG069523  | ATTTACGGTTAGTTGCAGGATGACAGG  | -1.74               | 0.00523             |
| BG069135  | TCATTGAAGCATTGACATCCCTACAC   | -1.74               | 0.0131              |
| NM_009610 | TGTGACATTGACATCCGCAAAGATTTG  | -1.72               | 0.0219              |
| BG143499  | ATTTAAGCACTTGACAGTATTCCATA   | -1.7                | 0.00479             |
| NM_010510 | AGAAGAGTTACTGCTTTGCCATCC     | -1.69               | 0.0359              |
| AK013540  | GTAAAGTACCCTGACTTTGGCTTCAGT  | -1.64               | 0.00531             |
| BB198104  | TGGAATAAGCTACTGAACCCTAAAT    | -1.64               | 0.00354             |
| BB363968  | TTTAGGTTATTGTTTAGTTGCTGAATA  | -1.64               | 0.0281              |
| BQ176868  | TACATGTTCTGCTGGTATTGTTGTAAT  | -1.61               | 0.0115              |
| BM239725  | TGTTATATCTCAGGAACCATCTGTCCT  | -1.61               | 0.0489              |
| BG069130  | ATGTACCTAATAGGATTGTGTTGATAT  | -1.61               | 0.000701            |
| AV066542  | TGAGTTTCTTTGATTGTTGACTATGCT  | -1.6                | 0.0115              |
| AK018446  | TAGTATACAGGACCCATCTGAAAGCAT  | -1.59               | 0.0403              |
| BQ174086  | TAAAGAGTGTTGTTCTTCTGACCTTGG  | -1.59               | 0.000261            |
| BB166245  | TAATGACATCTGGCAACTATCCACACT  | -1.59               | 0.0315              |
| BB822856  | CTATTTGCCTCTACTTTGTATTGTTGA  | -1.58               | 0.0122              |
| AV208097  | TATCCAAATGCAACCATATTTTATTAT  | -1.57               | 0.0494              |
| BG069498  | TGGACGAATGCAGGGATGAGCACAAAG  | -1.57               | 0.0485              |
| AV002845  | TAAGCAGATTACTTCCATCAGTATTGA  | -1.57               | 0.00205             |
| AK008551  | ATTTGACATCGGACCAGTGGAGATCTC  | -1.56               | 0.0437              |
| AV377334  | TCATGTCTCCACTGTTGATTTCGTGTTT | -1.56               | 0.0168              |
| BE948505  | TGTTTCTCTAGTATTGTTCTTATGCAT  | -1.56               | 0.0164              |
| AK019580  | TATGAGGATGCCACATCCATCTGACCT  | -1.56               | 0.0431              |
| BG066840  | GTAATATCCCAGAAAGTGTGACTAAC   | -1.56               | 0.0359              |
| BQ173880  | AGGGTAGGATAGGTTATTGTCATTTAT  | -1.55               | 0.0119              |
| AW909375  | GACATATTATTCTTACAGGTGTTTGTG  | -1.55               | 0.00589             |
| BC024836  | ATATGCAACTGGTTAGTGTGTTGACT   | -1.55               | 0.00557             |
| AK010380  | TATAACCCTAGAAGCATCACGAGAGAA  | -1.55               | 0.00557             |
| BB042575  | CTAATTAGTTCTATAGTGTGTTGACAG  | -1.54               | 0.0152              |
| NM_024435 | AGCTAATTCTTGGACCTGTGATTGTGAT | -1.53               | 0.00985             |
| AK018289  | GTGTATTATTTGTGTTGATTCTTTATA  | -1.53               | 0.00358             |

Supplemental Table 2: Results from In Vivo Screen 2

| GeneBank  | shRNA Sequence                | BI6 vs SCID Log2 FC | BI6 vs SCID q Value |
|-----------|-------------------------------|---------------------|---------------------|
| BF017629  | TGGTCTTCTTAGGTGATTCCTGTGAAA   | -1.53               | 0.0152              |
| BB127935  | ATGTTTCCTTCTAGGTTGGATTGTTGT   | -1.52               | 0.00932             |
| BG066541  | GAATAAGTTGTTTACTGTAACCCAAA    | -1.51               | 0.0105              |
| AW124687  | AGAAATTCGGGTATTGATTCAGGTAT    | -1.5                | 0.00358             |
| BC027174  | TTGGACTCCAGCCACAGGAAGCATCCT   | -1.49               | 0.0115              |
| BG081701  | TAGAAAGCCTTTGTGTATTGCCGTTT    | -1.49               | 0.00523             |
| NM_008903 | TCATTCAGGGAGCTGCTATGGCTATAC   | -1.48               | 0.0224              |
| NM_008319 | TGGACGTATGTATTGTTGCTCTCTAT    | -1.47               | 0.0115              |
| BB212031  | GAAGTTTGTGATTTGCCAGTCATTC     | -1.47               | 0.00479             |
| BB520662  | TCAGAGAACCATCTGCTAGACTTTAAT   | -1.47               | 0.014               |
| BB054332  | GTTATTGACTCCAGATTGATCATTGGA   | -1.47               | 0.00358             |
| C77984    | TTGTATTGCATCTTTGATATGTGTCTT   | -1.46               | 0.00678             |
| AK017626  | ACTTTGTATATTGCTTGACATCCGTAT   | -1.45               | 0.0431              |
| BB667153  | GTACTIONACTGTATTGACCCATGAATA  | -1.44               | 0.00153             |
| BG067064  | AGATAGGACTTGTGTTAGGATTGTGAA   | -1.44               | 0.0257              |
| BB400432  | GTTTCTGTGGTATTGTATTCTCTAAAT   | -1.43               | 0.00479             |
| BC027328  | GAAGTCACGAAGCTGAACCAGGAGCTG   | -1.42               | 0.0299              |
| BB519063  | TACAGTGATATTGTATGGTAGTATAAT   | -1.42               | 0.00201             |
| AF166486  | ATTGTTGTTTCCAGGATGGAGTTACTCTG | -1.42               | 0.000112            |
| AV267070  | GAGATATTTGATTGTTTCCTGGAAATG   | -1.41               | 0.0152              |
| BC021517  | CCTTCTGGCTCCATGGCTGTTAGCATA   | -1.39               | 0.0119              |
| BC005601  | GAACCTTCTTGATATGACGCATTGTCT   | -1.39               | 0.0355              |
| AW489260  | GATAACGTCCTTGGTGTGACATCTGGA   | -1.38               | 0.0117              |
| BB752129  | AGGTATTTGACCATTCACTGGCTGAGC   | -1.38               | 0.0192              |
| A1317241  | GTGATAACATTGACACCCGGACTGTCA   | -1.38               | 0.023               |
| BB539404  | CATTGACTTAGATGTTAGCTGCATACA   | -1.38               | 0.0158              |
| C77798    | ATTTCCATAAGTGACGGTGTGTTATAG   | -1.37               | 0.00792             |
| BG068694  | TGACTAGGTAGTTTGCTTTCTTCTGT    | -1.37               | 0.0136              |
| BB522094  | GCAGATACGCCAGTATTGTTGTTAAGG   | -1.37               | 0.024               |
| BB125172  | TCTATTGACCAGATGTGAGGTGCATAA   | -1.37               | 0.000798            |
| AF425084  | GAAAGGTTGTTCTTGTCAGTATTTTAT   | -1.37               | 0.0191              |
| AU016382  | GTTAGTGACACAACGGTGACAGGTAGC   | -1.37               | 0.0227              |
| NM_008182 | AAATACAATTGTTGATTCTGGCTATTG   | -1.36               | 0.0264              |
| BM247146  | GGACCTATCTGTTCTGGTATTGTTGT    | -1.36               | 0.0353              |
| BB138185  | AAGATAACTGGGTATTGTTTGTGATGTGA | -1.36               | 0.0141              |
| AK010086  | GAACCCTGTGTCTGGATGATTGTCACA   | -1.36               | 0.0264              |
| BM899023  | ACAGACCTGAAGTATTGTTTGAATAA    | -1.35               | 0.00176             |
| BB451404  | ACAGATGATTAAGGATTTAGCCAAAGA   | -1.35               | 0.00511             |
| BG069462  | GACATAGTGACCAGTATTGTTTGTGT    | -1.35               | 0.00441             |
| BE957271  | AGAGTATTTCTAGTTGTCGAAGTCAAT   | -1.35               | 0.0102              |

Supplemental Table 2: Results from In Vivo Screen 2

| GeneBank  | shRNA Sequence               | BI6 vs SCID Log2 FC | BI6 vs SCID q Value |
|-----------|------------------------------|---------------------|---------------------|
| BB294794  | GTCTGTTCTAAGGTATGTTGCTATAAT  | -1.34               | 0.015               |
| U58993    | GTTTGTATTCGTGTTCAATTGTGATTAA | -1.34               | 0.0141              |
| BB268102  | GATTGTTGCTAACTTCTGTTGTCCTAA  | -1.34               | 0.00479             |
| AU015158  | CTTTAGAAGTGTTGCCTAGTTGAACAA  | -1.34               | 0.0115              |
| BG074849  | GTCTATTGAAGTCTTGTTGATACCAGA  | -1.34               | 0.00325             |
| BM569571  | TGAACCACTTGAGAGCTACACCTGTCA  | -1.33               | 0.0087              |
| BB005556  | ACCTGCAGCTACCACGGACACCAGGAG  | -1.33               | 0.0255              |
| AV297525  | GTACAATACTCTGACATCCTACCAGTA  | -1.33               | 0.0458              |
| BB022982  | GGCTGAGTGCTAAGGATTGGTCTATGT  | -1.33               | 0.00959             |
| BG066267  | ATCCAACCTCCCAGCTTGACAGGAGAA  | -1.33               | 0.0497              |
| BB257743  | GAGTTGATTCTTTGCCTATTATTGAC   | -1.33               | 0.0324              |
| BG068711  | GAATATGTGTTTGACCTTTACAAGAA   | -1.32               | 0.015               |
| BB396783  | AGTATTGTTGGACTCTTTGCATTGTAT  | -1.32               | 0.0422              |
| NM_025318 | AGAAGTTAGTTGTCTCTGCCAGAAGTG  | -1.32               | 0.0147              |
| L11065    | TTATTTCTGTATTGCCTTGGGTTATAC  | -1.32               | 0.014               |
| NM_010404 | CCTTTGTATTGATGTATGTGCCAATGT  | -1.31               | 0.0431              |
| NM_026602 | CTATGTAAACTGTTGTATTGCTTCTGT  | -1.31               | 0.00354             |
| AW146284  | TAAACAGATTTAGACGTAGACAGGAAC  | -1.31               | 0.024               |
| BB701723  | TGTTGATGATATCCTGCCCTGTGGACC  | -1.31               | 0.00441             |
| AU022074  | GTGTGATAGGTAGACTCTTAGTGTTAA  | -1.31               | 0.00792             |
| AK013216  | ACTGTTATCCGTATTGCTTCATCTAAT  | -1.31               | 0.0175              |
| BQ176656  | CATGTTTGTGGTGATCTTTGTATTCT   | -1.3                | 0.0115              |
| BB490889  | GCAGTGTTGACATGCCTGGCTTTCATG  | -1.3                | 0.00792             |
| BB829587  | GATTAGAAGATAACACCCAGGAATTGT  | -1.3                | 0.013               |
| BM206269  | ATGTATCTATATTCTGGTACTCAAAGG  | -1.3                | 0.015               |
| AF059567  | GTATTGTATGAAGTTCCCGGGCCCTCT  | -1.3                | 0.00892             |
| AB008192  | AGGTCTTTGCGGAGTGCCTCAGTGACA  | -1.3                | 0.0402              |
| NM_011345 | ATCCAGTATTGTTGTCACAGGCGTAA   | -1.29               | 0.00892             |
| BE457827  | AGGAGTGCCTGTATTGTTGAAAGAAA   | -1.29               | 0.014               |
| NM_023910 | CAACTTCTCGGATTCAGGTTGTTGTTA  | -1.29               | 0.0119              |
| X63440    | TAAGTCTTTGTGTATCTTACTTGTA    | -1.28               | 0.0474              |
| NM_009001 | CCCAGCTCGGCCGTGGTGTATTGTGGT  | -1.28               | 0.0159              |
| AK004646  | AAGCAGAAGTATATTGACTGTGCAAA   | -1.28               | 0.02                |
| AV046786  | AGTGAAGTCTTATTGGTTGATGAAGT   | -1.28               | 0.00531             |
| BG070318  | ATGTTGGTTGATTCTCTTTGGTGATGT  | -1.28               | 0.0164              |
| BG076340  | GATGGTGACCCTCTTGACTTGAGAAGA  | -1.27               | 0.00557             |
| BB503481  | GTATGTTGAATTTATTGTTGGCTGGTA  | -1.27               | 0.0196              |
| BB766106  | GTAGACACCCGGAAGCAGGAACCATGG  | -1.27               | 0.0225              |
| BB272123  | CCAGTTCTGCCTGTTGTAGGTGTTGGA  | -1.27               | 0.0486              |
| AK015177  | TGAGTCTACACGATTCTTAGGTATTGT  | -1.27               | 0.0152              |

Supplemental Table 2: Results from In Vivo Screen 2

| GeneBank  | shRNA Sequence               | BI6 vs SCID Log2 FC | BI6 vs SCID q Value |
|-----------|------------------------------|---------------------|---------------------|
| NM_009707 | ATATTGTGTATTGTAACGTATGTGT    | -1.26               | 0.0332              |
| NM_021438 | CAAGGTTCTCGTGGCTGACAAGGACCT  | -1.26               | 0.0437              |
| AK017269  | ATCCTGTAGTCTGATTGTTGCTTTAAT  | -1.26               | 0.00531             |
| BQ174030  | TCCTCTCCAGTTTGTCAAGTATTGTGA  | -1.26               | 0.0481              |
| BB471557  | TAAAGTAGATATTGTGCCTAGTGACAG  | -1.26               | 0.0292              |
| BB536138  | GGTAATCGTATTTGGTCCTCTTTGATA  | -1.26               | 0.00201             |
| BB807032  | GAATGTATTGTATCCAAGGCCTTTGCA  | -1.26               | 0.013               |
| BI134671  | GAGAAACCTCGGAAGCAGCTAAGCTCT  | -1.26               | 0.0228              |
| AK019582  | TGATTGATTACCTCGTCTGGCCCTGGT  | -1.26               | 0.0368              |
| BM241722  | GATGAGAGTTGATTCTGCTTTAATAT   | -1.26               | 0.00663             |
| BI076815  | GAAGGTATTTCAAGTAGAGTTGGAATTA | -1.25               | 0.0117              |
| BB506495  | GTCTCAGAGGAGTTGATTGTTCCAT    | -1.25               | 0.00326             |
| BB076251  | ATTCCCTTGGTGTTGATTCTGTAAAGA  | -1.25               | 0.0248              |
| BE951146  | GATAGTTACCAGCATTCTGTACAGGAG  | -1.25               | 0.00173             |
| X63440    | TAAGTCTTTGTGTATCTTACTTGTA    | -1.25               | 0.022               |
| BB147418  | TGTTGATACTGCTTGACTCCACTAGAC  | -1.25               | 0.0103              |
| BB434117  | AGAATTGCTTTAAACTGAGTATTGATC  | -1.25               | 0.00892             |
| AW549928  | TCATTGCATGTGATAAGGTGATCATGA  | -1.24               | 0.00446             |
| AK007234  | CAACGTATTGTTCCCTGTCTTCAGATA  | -1.24               | 0.0231              |
| AK017091  | CTACTCCCAGCTTGTCGATGGATAACA  | -1.24               | 0.015               |
| AV042259  | TCCTACAGGGTAGTGTTGAGATTCTGT  | -1.24               | 0.016               |
| AW536798  | TGTATTCTGACTTCCATTGACAGGAT   | -1.24               | 0.0115              |
| BG076154  | TCTGCATGTTGCGTAGTTGATTTAAAG  | -1.24               | 0.0166              |
| BM219223  | ATACCCGATTGATGAGTACTAGGGC    | -1.24               | 0.0164              |
| BE861826  | GGATTTGGCTACAGATGTATTGGTATA  | -1.24               | 0.0192              |
| BC003764  | GATAACCCATTAGAAGCACAAGAATTA  | -1.24               | 0.00384             |
| AK004931  | ACTGACCCAGCAATAGAAGTGTTGAGA  | -1.24               | 0.0164              |
| AK017822  | GAGAAGAACC CGCATCAAAGCATAAGA | -1.24               | 0.0312              |
| BM206565  | ACTTCTGTTGGTAATGTATTAGTCTTA  | -1.23               | 0.00441             |
| AK008070  | GATTTCCCTCATTGTTGACCCTATTGAA | -1.23               | 0.0132              |
| BB332988  | CACTGAAGTGTTGTCCCTATATTGCAT  | -1.23               | 0.0437              |
| AI662452  | AAACTCAGATTAGAAGACTAAGGTGCT  | -1.23               | 0.0144              |
| AV300114  | TATTTAATAGTTGATGTGAGGGCTGGA  | -1.23               | 0.0129              |
| AK014951  | GACGTGTTATTTGTTGGTTTGGAATAT  | -1.23               | 0.0141              |
| BB482300  | TGAATTTGATTGTCCCTTCCCTCC     | -1.23               | 0.0115              |
| AV145466  | ATTCCCACGATACTGGTGTTTGCCTA   | -1.22               | 0.0117              |
| BE198251  | CTTAGGTATTGCTCTTTGGCTGTTAA   | -1.22               | 0.00399             |
| BB507557  | TTGTTATTGTTGAGAGGCAGCCAGATA  | -1.22               | 0.023               |
| BB408277  | GTGTTTGCATATTTGATTGTTCTAATA  | -1.22               | 0.0186              |
| BB328265  | TGTTGACTTCATATGCAGGTGACATAT  | -1.22               | 0.00358             |

Supplemental Table 2: Results from In Vivo Screen 2

| GeneBank  | shRNA Sequence               | BI6 vs SCID Log2 FC | BI6 vs SCID q Value |
|-----------|------------------------------|---------------------|---------------------|
| BB431008  | CTATACCTGTGTTTATTGACGCTAAT   | -1.22               | 0.00792             |
| BB121616  | GAATGATTGTATTGTCTCCTCCCATCT  | -1.22               | 0.0141              |
| BB032422  | CATTTACACGGACCATCAGAAGATTTTC | -1.22               | 0.0329              |
| NM_053132 | TGATGTGATTTCTAAGTGTTGTACAA   | -1.22               | 0.0159              |
| BB322201  | TATGTTGATTTAAGCGCGGCCCGGCTA  | -1.22               | 0.0317              |
| AU044383  | TAAACATGATTGTGATTCTGGAAGGAA  | -1.22               | 0.0262              |
| AK005193  | AGCTGACACGGAATGAACCCTGCAACA  | -1.21               | 0.0485              |
| AK020350  | TTACAGATAGAACCCAGCTTGCCCTCT  | -1.21               | 0.0255              |
| BB833422  | GAATTTAAGGTGTTTCTGCCAGTACTT  | -1.21               | 0.00358             |
| BB222737  | ATGTAGTTTGACTCCATATGAATATA   | -1.21               | 0.0182              |
| BM248709  | ACAAGAAAGTGTTGTCTAATCCTAGTA  | -1.21               | 0.00986             |
| AI642973  | GAAGCTAAGAGTGTTTGTGGTTGTAAT  | -1.21               | 0.0187              |
| BF137345  | GTATTGACTGTATTTCTTCTGTGTTAT  | -1.21               | 0.015               |
| BC020532  | GTCTCAGAGGAGTTGTATTGTTCCAT   | -1.2                | 0.00479             |
| AK017889  | AGAACCCAAGCTAGAGGAACCCCTCACT | -1.2                | 0.017               |
| BB550860  | AGTATTATTTGATTGGAGCTGTTTAGG  | -1.2                | 0.046               |
| BB176386  | GAAGCTTCTGTTTGGTATTGACACTT   | -1.2                | 0.0233              |
| BF467171  | GTATTTGCTGACATGGACCTGCTACAC  | -1.2                | 3.00E-04            |
| BB132288  | ATTTGTATTGTTCTCATTGTCCTGATG  | -1.2                | 0.03                |
| BI499978  | GTA CTCTTCTGTGATTGTTCTTTAAA  | -1.2                | 0.0145              |
| BB117756  | CTATTCTTACTGAAGTTTGTATGTGGA  | -1.2                | 0.0351              |
| AV124281  | TCCGGTTTGTCCAGTGATTGTTCTTTA  | -1.2                | 0.0464              |
| NM_053120 | TAGACGACAAGGATTAGTTCTTTCTAT  | -1.19               | 0.00792             |
| BB019121  | GTTGTAGAGATTTTCAGCAAGAAGCAAG | -1.19               | 0.00999             |
| BB465854  | TAAATAAGTTGTGTCTGCCAGTGTTGA  | -1.19               | 0.00531             |
| BB054454  | CGTAGATTGATAGCGCCCTCCAGTGGC  | -1.19               | 0.0115              |
| BI180598  | GAAGTGATTTCATTGACCGCAGCTAAA  | -1.19               | 0.0464              |
| BF181187  | AGCAAGTAGTTGGTGTTCACTCTCTAA  | -1.19               | 0.00892             |
| NM_011728 | TTGTGAAGAAGAACCCACGCCATTAC   | -1.19               | 0.031               |
| NM_007733 | AAGCAACCATCTGAGTCCTATTCTGAC  | -1.18               | 0.0351              |
| BQ031311  | ATGACTGTTTGATAGCGTTGTTAAGA   | -1.18               | 0.013               |
| AV307561  | GCTGACTGACATGCAGAGCTGCTTCAG  | -1.18               | 0.0311              |
| BB174749  | CAAGCTTCCGTGTTGATAGTACAGTGT  | -1.18               | 0.0332              |
| BB542455  | TGATGCCTGGACTTTGGTGTGTTATT   | -1.18               | 0.03                |
| AV229522  | AAACGTATTGATCTTTGGAGTGACCTA  | -1.18               | 0.0111              |
| AK020301  | GAAACTTGACTTGGTGTGCTACAGGA   | -1.18               | 0.0402              |
| AK013357  | ATAGGTGTTTGCTTGGCACGCAGGAGG  | -1.17               | 0.0178              |
| AK018211  | CAGTATTCAGATTGTGTGTCTTTCTGT  | -1.17               | 0.0115              |
| BB764011  | GTACGACCCTCGAAGCAACAAGTGGGA  | -1.17               | 0.0348              |
| AW543723  | ATGTTGATGCCTTCAGTCTGATGGACT  | -1.17               | 0.0164              |

Supplemental Table 2: Results from In Vivo Screen 2

| GeneBank  | shRNA Sequence               | BI6 vs SCID Log2 FC | BI6 vs SCID q Value |
|-----------|------------------------------|---------------------|---------------------|
| BE944943  | TAAAGTTGATTACCTCGCTCATTCTCG  | -1.17               | 0.0171              |
| AI593417  | GAGTTCTTTGACAGTGAGGGTTGATAG  | -1.17               | 0.0211              |
| AK012130  | GAGTGCTTCCTGTATTGTCTGTAAATC  | -1.17               | 0.0395              |
| AK012944  | TAGTATTCTGTTGAGCGTTTCCTTAAA  | -1.17               | 0.00663             |
| AK009986  | CTCAGGAAGCTGTGCTGGCCAAGGAAA  | -1.17               | 0.0449              |
| AK007675  | GGTGTGTCTCCAGGAAGCATCATGGA   | -1.17               | 0.014               |
| AI851177  | GATACCTGTCAGAATTGGAGTTATTTT  | -1.17               | 0.00792             |
| BQ176684  | CCTTATTGCAGTGGATTGATTTGATAG  | -1.16               | 0.0171              |
| AI447438  | ATAGTTATCCCAGGAGGTTGACCCTGG  | -1.16               | 0.0461              |
| BG067266  | AAAGTAATTTGATGCCTGGAAGTGTTT  | -1.16               | 0.0219              |
| BC027371  | CATTGTTAGTATTTGTCTCTCCTTAAA  | -1.16               | 0.015               |
| NM_080462 | TTGAGTTTCATTGGCTTACTGATAATA  | -1.15               | 0.0427              |
| M29881    | CGAAGAGTATGTGACCTTGATTGTTAT  | -1.15               | 0.046               |
| NM_033077 | ATTGGCCGTACAGGTCGTGTTGGAAAC  | -1.15               | 0.0285              |
| BB551848  | GAATGTTTTCGTTGTTCTGACCATGAAG | -1.15               | 0.0116              |
| AW125035  | ACTTACTGTTATTGACAGCTGTGTAGT  | -1.15               | 0.0161              |
| BE981615  | AGTTGATACCATTGCCAGTCCCATGCT  | -1.15               | 0.0212              |
| BB488380  | TTCTCAGGTTTGACGTGGGCTAGCCCT  | -1.15               | 0.00892             |
| BI739353  | GAAGTTTGACTACGTGTTTGCTGAGAA  | -1.14               | 0.0164              |
| AV151862  | CTAGGTAGGATTGTTGGGTCTCTCATA  | -1.14               | 0.0215              |
| AV233564  | CACTTTCTTGACTGGTATTTTCATAGAT | -1.14               | 0.012               |
| BB125604  | GATTGTTGCTCCATAGAGTCTGTTGTA  | -1.14               | 0.0158              |
| BE987325  | GTGTATTGCCAGTTTCTAGTGAATCA   | -1.14               | 0.0458              |
| BQ176837  | GTAGTCTGTATTGCTGAGTTCTTTGA   | -1.14               | 0.0436              |
| BG064069  | CCTTAGCCAGGTAGTATTGTCATTCAT  | -1.14               | 0.0152              |
| BI076789  | CATTGGTTGATATTGCATGGATATATG  | -1.14               | 0.0132              |
| NM_009266 | TTGAGCAGCTTGCCGACAGGAAAGGA   | -1.14               | 0.0103              |
| AK018651  | AGTTAGTTGGTATTGTAATCATTTAAT  | -1.13               | 0.00153             |
| BB369299  | AGGTGATTATTTGAGGAGTTTGGGATA  | -1.13               | 0.00557             |
| AI481875  | GAGTTTAGTATTTGAGCCCAGGTTATG  | -1.13               | 0.0225              |
| AK012700  | AGCAGTATTTAGAAGTCGAACCTTGTC  | -1.13               | 0.00967             |
| AV018484  | CACTGACATTGGGACATCACCTGGAAT  | -1.13               | 0.0117              |
| BM938335  | CTTTCATTTGATGTCTGTATTGCCAAT  | -1.13               | 0.0141              |
| NM_010552 | GTTGATTTAAGTTTCTCTCCTCTGAAT  | -1.12               | 0.0497              |
| BC016533  | ACATTCTGACATTCTCCTGACAAATGG  | -1.12               | 0.0097              |
| AV271892  | TTACAGATACAGTAAGATTGGTTAGAA  | -1.12               | 0.0438              |
| BB457668  | CCTCGTGTGTATGTTTGCCCTTGAT    | -1.12               | 0.0193              |
| BB523550  | TGCAGCTGTTTAGGGATTGTTTGGTTT  | -1.12               | 0.00663             |
| BB331017  | TCTTGAGGTTGTTTGATGCTTTAAATA  | -1.12               | 0.00849             |
| BB462437  | GGTGCTATGGGTATTGTTTCATTTATA  | -1.12               | 0.0315              |

Supplemental Table 2: Results from In Vivo Screen 2

| GeneBank  | shRNA Sequence               | BI6 vs SCID Log2 FC | BI6 vs SCID q Value |
|-----------|------------------------------|---------------------|---------------------|
| BB305810  | GTGTATGACTCTTGATGACGGTCTTAA  | -1.12               | 0.0328              |
| BG063160  | AAATGTTTAGTCTTGTTGATTTGGTTC  | -1.12               | 0.0492              |
| NM_013669 | GTACCTTTGTGATAGGATTGAAACCAA  | -1.11               | 0.0407              |
| AK012795  | CTTGGTTTGACTTCTCTATTTTCAGGAT | -1.11               | 0.0338              |
| BC017622  | GTTGACCAGAAAGCTCCCGAATACATC  | -1.11               | 0.0104              |
| BB404315  | ATCTTGACCAGTTATGTTGTTTGAATG  | -1.11               | 0.024               |
| AV274826  | TCTGGACTTGAAATCTGTACTIONTAA  | -1.11               | 0.0153              |
| AV312674  | GAGTTGAATTGCTTGTAGGACCTTTGG  | -1.11               | 0.0158              |
| BB070287  | TCTGAATTTGGGTGATGGGAAGCATGT  | -1.11               | 0.0448              |
| BB291827  | GGTGATGTAATGATCCAAGTGAAGAAC  | -1.11               | 0.0474              |
| BB292231  | TAAAGTATTGTTTAGCTCTGCTGAATT  | -1.11               | 0.0143              |
| BB303731  | TGCGCTCGCTGGTTGATTTAACGTTCA  | -1.11               | 0.0421              |
| NM_011693 | GGTTGACTTTCAGGTACTIONTAA     | -1.11               | 0.00523             |
| BI465746  | TCAGTTCTTTCTTTAGTGTGATTGTC   | -1.11               | 0.0153              |
| AU019881  | CCCAGAAGTTATTGAGCCTCCGGGTCA  | -1.1                | 0.00548             |
| AF332052  | AGAAGATTACCACCTCCAAGAAGCCAA  | -1.1                | 0.012               |
| M64266    | GATGCCAAGGACAGCACAGATCTTCTG  | -1.1                | 0.0353              |
| BF785056  | AGAGTGTTGTCCAGTGACAGGAGTTTG  | -1.1                | 0.032               |
| BI734389  | GAGAGTATTTGACCCGTTTCCTGCAGC  | -1.1                | 0.0242              |
| AV307358  | TAGTGTGTTGCTATTGTCTGTGCTACTT | -1.1                | 0.0152              |
| BB318357  | AGAAGAACCCTCACACCACACACATAA  | -1.1                | 0.0274              |
| BB710847  | TAGGTATTGGAGTTATAGACTGTTGTG  | -1.1                | 0.0166              |
| BB291885  | GTGACTGTTTGACTCTTGGTATTCAGA  | -1.1                | 0.049               |
| NM_007752 | GATTGTTTGTCGGAAGTCTTATGTGAA  | -1.1                | 0.0174              |
| BM220651  | TATATTGATTGTACTGCTCCCGCTGAA  | -1.1                | 0.0281              |
| AV336908  | GTTTCATCGGTGTTGAGTCTGTTTCTA  | -1.1                | 0.0115              |
| AV224102  | GAAGGCATTTGTTCCAAGGTGTTGAA   | -1.1                | 0.0167              |
| BB488978  | GTTTATTACGTATTTCTGGTTCTCAAT  | -1.1                | 0.0324              |
| NM_080795 | GAATTTCTCCCTGATCTGTTAGTGTTG  | -1.1                | 0.0188              |
| BC027174  | CCCAGGACGACAGATGAGCAGGAGAAA  | -1.09               | 0.0429              |
| BG070809  | TTATACAGGTGTTGCTCTTAGGAGTAC  | -1.09               | 0.0407              |
| AK015733  | GTAACTTTGTCAGTGATTGCTAGTTA   | -1.09               | 0.00892             |
| AK015821  | ACAAGACTTGTAGGATTGTCACCACAT  | -1.09               | 0.0147              |
| BG076151  | TAATTCAGAAGTAAACCTTTCATAGGA  | -1.09               | 0.047               |
| BB251859  | TGACATTGGTGAGTTCCTTTATTAAT   | -1.09               | 0.0105              |
| BM238272  | CAGGTTAGTATTGGCTCTGAGTCTCTG  | -1.09               | 0.0103              |
| BB555130  | ATGGCATATATCTTGACATCTGATCTT  | -1.09               | 0.0182              |
| BB768208  | GGTTAGTGTATTGTTGAGCAGGTCTAA  | -1.09               | 0.00792             |
| BB816770  | TGACACTTATTGGATGTGATTCTAAGT  | -1.09               | 0.0264              |
| NM_008088 | AGGTAGTTGCTACACAGGAAGCGAAGG  | -1.08               | 0.000261            |



Supplemental Table 2: Results from In Vivo Screen 2

| GeneBank  | shRNA Sequence               | BI6 vs SCID Log2 FC | BI6 vs SCID q Value |
|-----------|------------------------------|---------------------|---------------------|
| BC025874  | AGAACTCATCTGTGATTGTCAGGAGGA  | -1.08               | 0.045               |
| BB073296  | CCAAGAACCTTGCTACGGATTGGAGAT  | -1.08               | 0.0224              |
| BB417279  | TGGATTCTGTTCTGATTGTGTGATTGT  | -1.08               | 0.0157              |
| BE954335  | AGTGTTGTAATGGTTGCTAGTCTTTAT  | -1.08               | 0.0427              |
| BB306111  | TTAGTGGTAGAGTTATTGCCTGGCATA  | -1.08               | 0.0485              |
| AI158425  | ATGTTGACCAGTTGTCCTCGAACTCA   | -1.08               | 0.00479             |
| AK017541  | TAAGGATTGTGCTACAGTTGCTAGTGG  | -1.08               | 0.0498              |
| BG075178  | TTAAATTGTCAGAAGCCACCAGCTCCA  | -1.08               | 0.0185              |
| AK009111  | ATTATTGACCAGTTTATCCCGGTGTGT  | -1.07               | 0.0158              |
| AK020681  | AATGACGATAACCAGACCACCATTTAC  | -1.07               | 0.0212              |
| BB291766  | AGACCCAAAGAATTGACTCCATTTAAA  | -1.07               | 0.0183              |
| BE945021  | TCTGGTTCTGTGATTGAGAAATTTAAA  | -1.07               | 0.017               |
| BB318809  | CTCTCCCTGTCTGGAGGTATTGTTATG  | -1.07               | 0.0428              |
| BG067460  | TAATCCAACATGGAACCATCTCAGGAA  | -1.07               | 0.045               |
| BG069835  | ATTTGTGACATTAAGCAGGAGAGTTTG  | -1.07               | 0.0191              |
| NM_010701 | GACATTTGACCCTAGACTGGACCATGA  | -1.07               | 0.0153              |
| BC021525  | CAGGGAAGCATCTGAGAGGCTAGCATA  | -1.06               | 0.0458              |
| BE865094  | AGCAGATTGTAGTGACCCAGAGGTGAA  | -1.06               | 0.014               |
| BB074761  | GTATTGTTCTTTGATATTTCTATGTAA  | -1.06               | 0.0455              |
| BB655693  | ACTTTGTAGGTTTGTATTGCTTATACC  | -1.06               | 0.0233              |
| AI646720  | TTAGATGTATTGAGCACTGTGTAACTA  | -1.06               | 0.0178              |
| BM240795  | GTTGATATGTGTGCCTTGATTGTATAA  | -1.06               | 0.00211             |
| BB035768  | GTATGTTGAGATTTGCCAGGTGTGGG   | -1.06               | 0.0171              |
| BB216071  | ATTGCCTGTTGGTAGTTGAAATATAAG  | -1.06               | 0.0224              |
| BE634837  | GAACCTCCTATTGACAGTATGCTTTC   | -1.06               | 0.0485              |
| BM293801  | AGTATTGATCTATGTTCTGTTGTTAGA  | -1.06               | 0.0133              |
| AW548149  | TAAAGGTATTGCTCTGGTTGTCTCCAT  | -1.06               | 0.0267              |
| BB256689  | GGTAATTGTTGATGTACCCATTGACT   | -1.06               | 0.00289             |
| BC024597  | TGACCTTGATTGTAGTCCATTTAATAA  | -1.06               | 0.00844             |
| AV010392  | GCTATTTGAGGATTGCCATGTGTGCAA  | -1.06               | 0.0241              |
| NM_013464 | GTTTGTCTGTATTGCCAAGTGCCAAAT  | -1.05               | 0.00792             |
| D17919    | GACATAGAAGTCAAAGGCCAAACATTT  | -1.05               | 0.028               |
| AY094172  | ATGTTTGACATAATCCTGGACGAGAAC  | -1.05               | 0.0379              |
| BB424644  | TTCTTGTTCTACAGGTTTGATTCTAAT  | -1.05               | 0.0191              |
| BG083246  | CAAACGATATAGTTGCTGTCAGGATTA  | -1.05               | 0.0306              |
| AK019559  | AAAGTGTTTGTCTGTTCTGTCCATTCAG | -1.05               | 0.0215              |
| BG070008  | GTCTTTGTATGGTTGACAGCATGCAGT  | -1.05               | 0.00358             |
| BB394142  | GGCTCCTTCGAGTGTGTTGATTTGTAAA | -1.05               | 0.0166              |
| BM117916  | TGATAATGTGATAGGCAGGCTGGCCAA  | -1.05               | 0.0162              |
| BB733992  | TCCTCTGACCGATGCTTGTGAATTGTG  | -1.05               | 0.013               |

Supplemental Table 2: Results from In Vivo Screen 2

| GeneBank  | shRNA Sequence               | BI6 vs SCID Log2 FC | BI6 vs SCID q Value |
|-----------|------------------------------|---------------------|---------------------|
| BB463128  | AGTTGTTTGTGACCCATGTCCGATAG   | -1.05               | 0.0297              |
| BQ129058  | CTTTGACTGTTGTAATTGGTAACTTG   | -1.05               | 0.0166              |
| BB487289  | TGACAGCTCCGGTGTGTGTATTTC     | -1.05               | 0.0225              |
| AA985754  | AAGCTGAAGAAGCTATAAAGGATGTTA  | -1.05               | 0.00235             |
| NM_010393 | CTGCAGAGTATTGTGAGGACTTCCTGA  | -1.05               | 0.0292              |
| AV160737  | GAAAGAACCCAAAGGAGCATCGTATGG  | -1.05               | 0.033               |
| BB240897  | CATGTTCTGACAGTTGTAGCCCTCAT   | -1.05               | 0.0105              |
| U13174    | ATTGCTTTCTGACGTGTGTATGTGTGT  | -1.04               | 0.014               |
| NM_025551 | TATAAGGATTGGTACACTGGTGGGAGA  | -1.04               | 0.00358             |
| BC018297  | CAAGTTTGACCCAAAGGTGGATGATAA  | -1.04               | 0.0236              |
| BC021448  | CCTTTGACTACAGGAGGAGTGTGAA    | -1.04               | 0.0483              |
| AK020543  | TAATGGTGTAGTTTGCCTTTGTTCTT   | -1.04               | 0.014               |
| AV016940  | AGTTTGCCTTGTGAGGGTGTGAGT     | -1.04               | 0.0448              |
| BB151173  | ATTGTGATTAGTGAGTGCCGCTTGAGC  | -1.04               | 0.0119              |
| BB278628  | GAGAGGACCTCAGGATAGTTTATATGT  | -1.04               | 0.0145              |
| AV225034  | CTTGCTTTATGATGTTGGTGTGAACT   | -1.04               | 0.0395              |
| BM941145  | TCTTGTGCAGTATTGTGACTCCCAAGA  | -1.04               | 0.017               |
| BB165231  | ATGACACCTCAGTGTAGTTATTGTTAT  | -1.04               | 0.0293              |
| BB474913  | ATCTTTGACAGTGCTAGGTATGGGAAT  | -1.04               | 0.0224              |
| BB506415  | GGGTTGGAAATAAATAACGGTGATGGT  | -1.04               | 0.0246              |
| BB083438  | GGGTGACTTCTGATTAGTTGTGTAAT   | -1.04               | 0.00986             |
| BB009155  | GAAATGTTGTATTGACTCTCTGAGTCT  | -1.04               | 0.00985             |
| BC008174  | GCGTTAATGACGTCTTTGTGATTGAAG  | -1.03               | 0.0187              |
| AK006661  | GAAGGTATCTCATTGGACACGTATTCA  | -1.03               | 0.0234              |
| BE981485  | ATTTACCCAGAATTGACCTGCCTTTGC  | -1.03               | 0.00677             |
| BB705380  | GGAAGGTTAGCTGTAATCACGTGAGCA  | -1.03               | 0.00986             |
| BB794710  | GTATGTCAGGATTAGTTTAGCCAATAG  | -1.03               | 0.0431              |
| AI506066  | ACATGTTAACTATGGTGATTCAATTCT  | -1.03               | 0.0403              |
| BB634277  | AGCCAGGCACTGGTGATTTAGTAAATA  | -1.03               | 0.0337              |
| AI464148  | ATTTGTTTCATCGTTGTGTTGCCTCAGC | -1.03               | 0.0301              |
| BB502529  | GTACCTTGTGTTGTGGTTGACTCCAAC  | -1.03               | 0.00643             |
| BG068354  | TTGCAAAGTAGTTGTGTCAGGGACTTG  | -1.03               | 0.0147              |
| BM195033  | GAAGGATCTATTGGTTGTCTGAATAAT  | -1.03               | 0.03                |
| BB713790  | CTGCTCAGTATTGCTTATTGACCATCT  | -1.03               | 0.0312              |
| BB165757  | TGGGTGTTCCGTTTGTGGTCTGCTTT   | -1.03               | 0.0407              |
| BF536757  | GTGATTTGGTTAGTGTTAGTATGTTTC  | -1.03               | 0.012               |
| BB729869  | AGGATTGGGATGACTTCTGCTTCTAGA  | -1.03               | 0.014               |
| BC018446  | ATTTGACAGTGTATGCATTTGAACAAA  | -1.03               | 0.00892             |
| AK009460  | CAGAGGAAGAACCATCGACCAGCACTG  | -1.03               | 0.0448              |
| BB385366  | GCTTTAGATTTGATTGGCAGGGCTTCT  | -1.03               | 0.0225              |

Supplemental Table 2: Results from In Vivo Screen 2

| GeneBank  | shRNA Sequence               | BI6 vs SCID Log2 FC | BI6 vs SCID q Value |
|-----------|------------------------------|---------------------|---------------------|
| BI965035  | TTCTAAATAAGTGTTCCTCTCCTCT    | -1.03               | 0.0282              |
| C80158    | CGTTGTTTCTGCGATTGGTATGTACAG  | -1.02               | 0.0407              |
| BI558379  | ATGATTCAGGTTTGATACTTACCATT   | -1.02               | 0.0499              |
| AK014472  | CATGGTTTCATATGGTGATTCTTACAT  | -1.02               | 0.0225              |
| AK002930  | CTGCTCATGACTGGGTATTGATTTCT   | -1.02               | 0.0178              |
| AK021383  | ATAACCAGGTATTGTAAGTCTCCATTT  | -1.02               | 0.0283              |
| AK016604  | GTCCTTGTTCTAGGGTGACTGGATTGT  | -1.02               | 0.0367              |
| AK020073  | TGATGTTTGACAGCCATTGTTTATCAT  | -1.02               | 0.00417             |
| BM236206  | TGATGTATTCTCAGTAAGGTTTCAGAAT | -1.02               | 0.00211             |
| BI439550  | AAAGATTAAGAAGGACCCATCAATTAT  | -1.02               | 0.017               |
| BB757123  | GGTATTGTGCCTCTGTTGTGTGTTGA   | -1.02               | 0.0447              |
| BB462178  | CATCAAGAAGTAAACGAGGGCAGGAGT  | -1.02               | 0.0234              |
| BB386167  | ACACGATTTGGTTGCATGTGATAAACA  | -1.02               | 0.0148              |
| BE946999  | TTCTCTCAAGCGTAACGCAGCTGTCA   | -1.02               | 0.0346              |
| AV296285  | TGTTTGATACTGTGTGCGACGTGGAGA  | -1.02               | 0.00792             |
| BF464242  | TCAGGGACCCGATTGGTGCTGGACACA  | -1.02               | 0.0178              |
| C77308    | GATTGAGTCTCCAGTATGTTTCTTAAG  | -1.02               | 0.0297              |
| AI595379  | TTACCCTCTGAACTACAGCCAATCCT   | -1.02               | 0.0192              |
| AF479673  | GATTGAATTCGTGATGCCTTGTTCA    | -1.02               | 0.0178              |
| BB291816  | TGATTGAGCTATTTGACTTGACTTCAT  | -1.02               | 0.0394              |
| NM_025464 | TTCTCGGAACCCATATGCAGGATTTCT  | -1.01               | 0.0377              |
| AF169826  | GCTATAAAGTGTTCGACCTTCGCTACA  | -1.01               | 0.0119              |
| AI606617  | AAAGGTGATCCAAGATTAGTAATGTTT  | -1.01               | 0.00358             |
| AA881383  | TTAGGTAGAAGCACCCCTGGTCTGAGGG | -1.01               | 0.0119              |
| BE979753  | TTAACACCAAGCAAGCAGGAACCTTGC  | -1.01               | 0.04                |
| BB478562  | GTAAGTTTGATACTGACCCTGTTTCAG  | -1.01               | 0.017               |
| BM125285  | GCAGGTATTGCCGTAGGTGTTCAATTA  | -1.01               | 0.0224              |
| BB013432  | AGACTGATGATAGTGTTCGGCATGAGA  | -1.01               | 0.0427              |
| BB211484  | GATTTGTGCTTGACATCAGTATCCATC  | -1.01               | 0.0103              |
| BB667457  | TAACCTGTTTGTGTTGGTTGATGCTGT  | -1.01               | 0.0141              |
| BB194779  | TAAGGTGTTCTTGTATTTGCTGCCTAA  | -1.01               | 0.046               |
| BB244838  | CAGGTGGGATTTCGATTGTCTATGGAAG | -1.01               | 0.0375              |
| NM_028375 | TAAGTTGATTATGGCCCTCATGGCCTG  | -1.01               | 0.0312              |
| AK016849  | ATACCTGCCAGTAGTTGATGCACAGAA  | -1.01               | 0.0462              |
| BG068357  | TGTCTATTGTTTGAAGGTGTTGCCTAT  | -1.01               | 0.017               |
| BG064671  | ACAGTGACTCCAGAATCAATCAAAGTA  | -1.01               | 0.015               |
| BB481932  | GATTGGTTCTTAATTGATTTGGACTAT  | -1.01               | 0.015               |
| BC024696  | TACTGATTGTTGGGAAGGTCCTTGG    | -1                  | 0.0147              |
| AK004807  | ACCTTGGCAGGTATAGTGTTCGGAGGA  | -1                  | 0.0119              |
| BB547478  | GAGTTTCTGTTGTATTGGATGCCTAT   | -1                  | 0.0315              |

Supplemental Table 2: Results from In Vivo Screen 2

| <b>GeneBank</b> | <b>shRNA Sequence</b>       | <b>Bl6 vs SCID Log2 FC</b> | <b>Bl6 vs SCID q Value</b> |
|-----------------|-----------------------------|----------------------------|----------------------------|
| BB529013        | ATTTGACTTTGGACTAGGACTGGTAAG | -1                         | 0.0115                     |
| BB779105        | GGAATTG TTCAGAATGGAATTGTCAT | -1                         | 0.0223                     |
| BB340127        | GATTAGAAGTATATGGGCTCGCCACA  | -1                         | 0.048                      |
| AK008824        | ACGTATTTGATGTAAGGACTGGCATGG | -1                         | 0.0141                     |
| BB439493        | AGATGTTTGATACCTGCATTTGCAGGT | -1                         | 0.0164                     |
| BB027654        | TACTCATCTTGTTGTGTCAGAAATA   | 1.49                       | 0.0415                     |
| AW556269        | TCATGTCTCACACCAAGTTTACCAATG | 2.49                       | 0.0261                     |
| BM241540        | TGTTCACTAGCAAATATTCCATAATAA | 2.7                        | 0.0216                     |
